# Supplementary material for: Genetic Dissection of Nitrogen Use Efficiency in Tropical Maize Through Genome-Wide Association and Genomic Prediction
Source: Front Plant Sci. 2020 Apr 28;11:474. doi: 10.3389/fpls.2020.00474 (PMC7198882; doi:10.3389/fpls.2020.00474)
Supplement: Supplementary file 1 [file Data_Sheet_1.xlsx]

## Sheet: LowN
Table 1: BLUEs and BLUPs estimated across locations for grain yield and other agronomic traits evaluated under low N conditions
Genotype	BLUP_GY	BLUE_GY	BLUP_FW	BLUE_FW	BLUP_AD	BLUE_AD	BLUP_ASI	BLUE_ASI	BLUP_PH	BLUE_PH	BLUP_EH	BLUE_EH	BLUP_EPO	BLUE_EPO	BLUP_EPP	BLUE_EPP	BLUP_SEN2	BLUE_SEN2
IMAS-1:D08WFACXX:1:250018573	2.759	2.557	2.922	2.697	72.41	72.458	3.373	3.567	163.776	163.456	71.487	71.376	0.431	0.432	0.869	0.839	2.214	2.003
IMAS-10:D08WFACXX:1:250018578	3.161	3.225	3.239	3.281	72.475	72.515	2.348	2.281	170.603	171.064	73.269	73.42	0.428	0.428	0.874	0.857	2.333	2.552
IMAS-100:D08WFACXX:2:250018738	3.353	3.539	3.52	3.797	73.133	73.219	2.119	1.989	172.69	173.508	70.942	70.848	0.41	0.407	0.892	0.919	2.26	2.232
IMAS-101:D08WFACXX:2:250018739	3.239	3.378	3.301	3.419	71.551	71.548	2.219	2.096	169.084	169.519	72.131	72.163	0.419	0.418	0.884	0.891	2.313	2.494
IMAS-102:D08WFACXX:2:250018703	3.024	2.988	3.145	3.11	73.017	73.099	1.565	1.34	165.739	165.704	71.614	71.595	0.43	0.43	0.864	0.823	2.254	2.185
IMAS-103:D08WFACXX:2:250018740	3.332	3.517	3.459	3.702	71.879	71.891	2.115	1.996	169.687	170.187	71.777	71.771	0.417	0.415	0.887	0.9	2.296	2.371
IMAS-104:D08WFACXX:2:250018704	3.314	3.467	3.391	3.55	72.264	72.311	1.905	1.722	161.788	161.25	70.404	70.193	0.426	0.426	0.878	0.87	2.242	2.145
IMAS-105:D08WFACXX:2:250018741	3.343	3.516	3.433	3.633	71.453	71.438	2.399	2.339	165.542	165.556	67.787	67.249	0.406	0.402	0.89	0.908	2.226	2.05
IMAS-106:D08WFACXX:2:250018705	3.011	2.965	3.18	3.164	73.83	73.957	2.973	3.066	167.076	167.169	69.624	69.354	0.416	0.414	0.891	0.912	2.3	2.38
IMAS-107:D08WFACXX:2:250018706	3.209	3.289	3.363	3.497	71.653	71.654	2.081	1.939	170.16	170.635	69.516	69.181	0.401	0.397	0.884	0.892	2.253	2.198
IMAS-108:D08WFACXX:2:250018707	3.202	3.303	3.243	3.297	72.769	72.853	2.005	1.835	164.474	164.397	73.205	73.443	0.439	0.441	0.886	0.895	2.225	2.06
IMAS-109:D08WFACXX:2:250018708	3.212	3.298	3.308	3.398	72.46	72.513	1.994	1.836	165.278	165.141	72.679	72.832	0.436	0.438	0.885	0.895	2.276	2.297
IMAS-11:D08WFACXX:1:250018579	3.197	3.367	3.353	3.614	72.82	72.949	2.536	2.509	169.621	170.44	77.652	79.149	0.452	0.459	0.876	0.854	2.291	2.456
IMAS-110:D08WFACXX:2:250018709	3.132	3.178	3.18	3.187	72.424	72.48	2.16	2.042	153.718	152.316	66.243	65.511	0.428	0.428	0.886	0.895	2.178	1.839
IMAS-111:D08WFACXX:2:250018710	3.208	3.29	3.302	3.393	70.756	70.71	1.973	1.826	160.884	160.358	68.44	67.999	0.424	0.424	0.892	0.917	2.309	2.464
IMAS-112:D08WFACXX:2:250018711	2.765	2.584	2.916	2.696	72.591	72.651	2.014	1.858	166.617	166.601	72.532	72.579	0.425	0.424	0.884	0.893	2.332	2.543
IMAS-113:D08WFACXX:2:250018742	3.137	3.171	3.202	3.204	72.57	72.63	2.033	1.899	175.093	176.148	71.996	72.043	0.408	0.405	0.865	0.829	2.245	2.147
IMAS-114:D08WFACXX:2:250018743	3.119	3.158	3.242	3.292	72.529	72.576	2.283	2.2	164.692	164.537	73.855	74.091	0.443	0.446	0.881	0.879	2.29	2.363
IMAS-115:D08WFACXX:2:250018744	3.043	3.022	3.156	3.136	73.103	73.206	2.144	2.022	165.593	165.685	73.942	74.281	0.442	0.445	0.879	0.873	2.267	2.265
IMAS-116:D08WFACXX:2:250018712	2.753	2.538	2.872	2.588	72.324	72.364	3.064	3.187	165.041	164.882	67.852	67.278	0.414	0.412	0.872	0.849	2.265	2.245
IMAS-117:D08WFACXX:2:250018713	2.978	2.625	3.055	2.476	72.141	72.269	2.084	1.48	170.989	173.298	70.984	70.282	0.426	0.425	0.877	0.8	2.325	2.966
IMAS-118:D08WFACXX:2:250018714	2.847	2.699	3.007	2.854	72.002	72.018	3.539	3.768	167.482	167.778	72.784	72.994	0.427	0.427	0.868	0.836	2.273	2.285
IMAS-119:D08WFACXX:2:250018715	3.201	3.283	3.316	3.413	71.971	71.998	2.078	1.942	168.68	169.056	73.621	73.911	0.433	0.434	0.885	0.895	2.302	2.397
IMAS-12:D08WFACXX:1:250018580	3.034	3.004	3.123	3.059	73.696	73.838	2.215	2.115	175.872	177.027	78.772	79.588	0.441	0.443	0.865	0.828	2.351	2.647
IMAS-121:D08WFACXX:2:250018745	3.102	3.128	3.218	3.248	70.639	70.564	2.126	1.968	174.528	175.762	78.099	79.036	0.442	0.445	0.881	0.881	2.269	2.24
IMAS-122:D08WFACXX:2:250018717	3.247	3.378	3.372	3.552	71.261	71.241	2.591	2.581	163.756	163.511	68.069	67.465	0.419	0.418	0.883	0.888	2.277	2.318
IMAS-123:D08WFACXX:2:250018718	2.935	2.836	3.073	2.967	74.338	74.524	3.854	4.228	167.522	167.708	73.941	74.22	0.431	0.432	0.885	0.896	2.292	2.395
IMAS-124:D08WFACXX:2:250018719	2.946	2.867	3.217	3.255	74.055	74.225	1.842	1.611	180.129	182.115	80.816	82.183	0.442	0.445	0.878	0.87	2.248	2.12
IMAS-126:D08WFACXX:2:250018721	3.126	3.169	3.298	3.414	72.804	72.888	1.881	1.667	166.574	166.677	67.906	67.358	0.407	0.404	0.882	0.886	2.295	2.41
IMAS-127:D08WFACXX:2:250018722	2.675	2.422	2.89	2.638	69.02	68.869	2.765	2.81	165.861	165.913	77.995	78.859	0.465	0.471	0.883	0.886	2.299	2.422
IMAS-128:D08WFACXX:2:250018723	3.274	3.406	3.331	3.453	71.758	71.763	2.657	2.67	171.938	172.695	74.902	75.294	0.432	0.433	0.892	0.917	2.299	2.387
IMAS-129:D08WFACXX:2:250018724	2.984	2.92	3.105	3.013	71.229	71.183	2.75	2.784	162.136	161.6	71.268	71.135	0.431	0.431	0.884	0.893	2.243	2.139
IMAS-13:D08WFACXX:1:250018581	2.964	2.892	3.041	2.915	72.887	72.974	2.723	2.748	166.79	166.772	72.374	72.378	0.432	0.432	0.88	0.876	2.244	2.168
IMAS-130:D08WFACXX:2:250018725	2.563	2.087	2.677	2.088	67.811	67.472	3.37	3.634	168.784	169.237	68.662	68.119	0.401	0.395	0.88	0.873	2.224	2.032
IMAS-131:D08WFACXX:2:250018726	3.199	3.295	3.266	3.334	69.792	69.679	2.111	1.979	158.109	157.135	67.988	67.462	0.424	0.423	0.894	0.925	2.227	2.07
IMAS-132:D08WFACXX:2:250018727	2.67	2.415	2.766	2.413	67.603	67.35	2.62	2.617	157.367	156.519	65.486	64.754	0.414	0.411	0.878	0.871	2.29	2.375
IMAS-133:D08WFACXX:2:250018728	2.882	2.759	3.012	2.86	70.141	70.054	2.289	2.212	158.914	158.182	69.788	69.517	0.434	0.435	0.88	0.878	2.388	2.808
IMAS-134:D08WFACXX:2:250018729	2.931	2.855	3.055	2.958	67.571	67.331	2.527	2.497	163.569	163.362	64.457	63.541	0.393	0.387	0.884	0.891	2.324	2.481
IMAS-135:D08WFACXX:2:250018730	3.055	3.047	3.247	3.298	70.512	70.451	2.151	2.036	160.318	159.744	59.797	58.272	0.371	0.361	0.893	0.92	2.256	2.206
IMAS-136:D08WFACXX:2:250018746	2.969	2.91	3.172	3.163	70.159	70.071	2.519	2.496	164.815	164.669	63.843	62.822	0.385	0.378	0.88	0.879	2.288	2.349
IMAS-137:D08WFACXX:2:250018731	3.374	3.566	3.3	3.388	70.644	70.59	2.74	2.766	164.522	164.32	76.346	76.934	0.454	0.458	0.892	0.916	2.313	2.445
IMAS-138:D08WFACXX:2:250018747	2.681	2.428	2.806	2.48	69.295	69.154	2.964	3.084	156.905	155.882	70.16	69.955	0.438	0.439	0.875	0.862	2.303	2.423
IMAS-139:D08WFACXX:2:250018732	3.271	3.428	3.42	3.657	69.456	69.301	2.229	2.11	169.632	170.064	77.175	77.915	0.449	0.453	0.884	0.891	2.246	2.138
IMAS-14:D08WFACXX:1:250018582	3.296	3.446	3.285	3.368	71.135	71.088	3.503	3.733	159.625	158.954	65.641	64.863	0.404	0.4	0.884	0.891	2.189	1.908
IMAS-140:D08WFACXX:2:250018733	2.77	2.572	2.806	2.487	67.843	67.621	2.544	2.529	148.513	146.388	59.159	57.501	0.395	0.39	0.883	0.887	2.354	2.621
IMAS-141:D08WFACXX:2:250018734	3.54	3.839	3.47	3.692	68.965	68.797	2.125	2.018	165.68	165.63	69.23	68.888	0.415	0.413	0.897	0.938	2.279	2.296
IMAS-142:D08WFACXX:2:250018735	2.964	2.892	3.055	2.94	69.585	69.459	2.113	1.988	166.059	166.154	72.954	73.131	0.432	0.432	0.885	0.894	2.214	2.027
IMAS-143:D08WFACXX:2:250018736	3.16	3.227	3.259	3.32	69.793	69.678	2.374	2.344	157.094	155.978	61.538	60.191	0.391	0.385	0.886	0.895	2.222	2.052
IMAS-144:D08WFACXX:2:250018737	2.813	2.646	2.937	2.724	69.268	69.124	2.86	2.921	161.198	160.59	64.293	63.306	0.396	0.391	0.902	0.951	2.231	2.111
IMAS-145:D08WFACXX:2:250018748	3.075	3.078	3.183	3.175	69.368	69.224	2.397	2.358	163.807	163.53	70.29	70.063	0.426	0.426	0.892	0.917	2.337	2.541
IMAS-146:D08WFACXX:2:250018749	2.991	2.947	3.088	3.011	69.718	69.614	3.017	3.108	159.476	158.84	66.788	66.256	0.408	0.405	0.898	0.935	2.305	2.414
IMAS-147:D08WFACXX:2:250018750	3.032	3.001	3.167	3.135	71.635	71.65	2.035	1.89	167.559	167.781	70.263	70.111	0.418	0.417	0.869	0.842	2.362	2.695
IMAS-148:D08WFACXX:2:250018751	2.656	2.389	2.803	2.489	72.854	72.917	2.455	2.403	168.76	168.933	72.532	72.549	0.427	0.427	0.896	0.929	2.242	2.148
IMAS-149:D08WFACXX:2:250018752	2.869	2.744	2.909	2.685	66.677	66.376	2.237	2.141	151.396	149.656	66.485	65.654	0.43	0.43	0.878	0.87	2.266	2.234
IMAS-15:D08WFACXX:1:250018583	2.97	2.89	2.978	2.757	71.975	72.001	2.284	2.188	168.796	169.164	73.698	73.925	0.431	0.431	0.88	0.876	2.271	2.261
IMAS-150:D08WFACXX:2:250018753	2.944	2.861	3.052	2.941	67.009	66.734	2.479	2.45	166.791	166.98	71.013	71.023	0.422	0.422	0.886	0.897	2.212	2.003
IMAS-151:D08WFACXX:2:250018754	3.378	3.574	3.4	3.576	67.228	66.962	3.024	3.131	160.827	160.191	67.504	66.898	0.411	0.409	0.889	0.908	2.226	2.085
IMAS-152:D08WFACXX:2:250018755	3.261	3.368	3.241	3.269	71.938	71.965	3.168	3.311	160.931	160.405	70.567	70.403	0.435	0.436	0.887	0.9	2.29	2.35
IMAS-153:D08WFACXX:2:250018756	3.317	3.476	3.454	3.669	73.221	73.314	1.797	1.6	163.22	162.934	72.597	72.704	0.441	0.443	0.875	0.861	2.261	2.222
IMAS-154:D08WFACXX:2:250018757	3.141	3.184	3.234	3.257	71.871	71.885	2.615	2.616	168.941	169.236	74.174	74.445	0.437	0.438	0.887	0.901	2.218	2.036
IMAS-155:D08WFACXX:2:250018758	3.19	3.247	3.228	3.226	71.15	71.133	1.978	1.828	153.664	152.317	71.702	71.708	0.46	0.464	0.886	0.897	2.329	2.54
IMAS-156:D08WFACXX:2:250018759	2.884	2.76	3.12	3.054	70.747	70.679	2.512	2.503	157.837	156.968	64.312	63.3	0.404	0.4	0.888	0.904	2.254	2.179
IMAS-157:D08WFACXX:2:250018760	3.21	3.303	3.226	3.254	69.764	69.645	1.979	1.823	167.743	167.971	73.054	73.203	0.43	0.43	0.874	0.86	2.284	2.341
IMAS-158:D08WFACXX:2:250018761	2.964	2.89	3.07	2.959	69.722	69.596	2.433	2.369	150.383	148.514	62.038	60.713	0.408	0.405	0.887	0.901	2.291	2.369
IMAS-159:D08WFACXX:2:250018762	2.913	2.79	2.945	2.698	68.212	67.905	1.468	1.097	150.324	148.014	61.184	59.32	0.404	0.399	0.873	0.846	2.268	2.238
IMAS-16:D08WFACXX:1:250018584	3.056	3.036	3.293	3.384	72.328	72.368	2.393	2.351	175.764	176.897	77.363	77.964	0.436	0.437	0.881	0.88	2.276	2.298
IMAS-160:D08WFACXX:2:250018763	3.281	3.421	3.323	3.442	69.608	69.486	1.997	1.847	178.268	179.736	79.302	80.245	0.44	0.442	0.893	0.92	2.364	2.683
IMAS-161:D08WFACXX:2:250018764	3.192	3.365	3.26	3.384	69.883	69.669	3.086	3.339	170.82	171.999	72.523	72.711	0.422	0.421	0.885	0.902	2.278	2.334
IMAS-162:D08WFACXX:2:250018765	3.274	3.396	3.275	3.331	69.772	69.667	1.629	1.389	175.627	176.625	76.746	77.372	0.433	0.434	0.894	0.923	2.346	2.605
IMAS-163:D08WFACXX:2:250018766	3.225	3.322	3.322	3.43	72.756	72.822	1.982	1.819	154.363	153.045	63.733	62.718	0.406	0.403	0.882	0.883	2.25	2.166
IMAS-164:D08WFACXX:2:250018767	3.161	3.219	3.234	3.267	72.298	72.344	1.803	1.608	166.299	166.381	75.993	76.502	0.447	0.45	0.89	0.908	2.166	1.799
IMAS-165:D08WFACXX:2:250018768	3.186	3.244	3.317	3.397	69.016	68.85	1.128	0.761	156.433	155.246	68.952	68.452	0.438	0.439	0.892	0.915	2.235	2.11
IMAS-166:D08WFACXX:2:250018769	3.16	3.204	3.237	3.262	67.071	66.795	1.744	1.535	153.367	151.987	67.34	66.815	0.43	0.43	0.901	0.946	2.225	2.087
IMAS-167:D08WFACXX:2:250018770	3.535	3.853	3.587	3.938	68.666	68.472	2.096	1.95	168.72	169.076	75.56	75.991	0.446	0.449	0.904	0.956	2.267	2.243
IMAS-168:D08WFACXX:2:250018771	3.198	3.281	3.335	3.46	68.923	68.757	0.897	0.454	166.967	167.159	70.696	70.562	0.423	0.422	0.9	0.942	2.297	2.395
IMAS-169:D08WFACXX:2:250018772	3.039	3.031	3.193	3.209	68.433	68.213	1.944	1.787	164.227	163.946	67.2	66.442	0.399	0.394	0.897	0.935	2.212	1.957
IMAS-17:D08WFACXX:1:250018615	3.077	3.09	3.238	3.286	70.037	69.948	2.968	3.044	157.709	156.914	74.078	74.501	0.46	0.466	0.879	0.873	2.254	2.199
IMAS-170:D08WFACXX:2:250018773	3.221	3.322	3.287	3.377	68.414	68.229	1.926	1.755	145.724	143.507	60.011	58.556	0.406	0.403	0.888	0.902	2.226	2.073
IMAS-171:D08WFACXX:2:250018774	3.33	3.513	3.351	3.507	67.888	67.666	2.173	2.059	154.924	153.575	63.019	61.826	0.406	0.403	0.89	0.909	2.284	2.308
IMAS-172:D08WFACXX:2:250018775	3.032	2.995	3.089	2.995	67.244	66.99	1.638	1.378	147.286	145.097	63.017	61.921	0.422	0.422	0.888	0.904	2.328	2.503
IMAS-173:D08WFACXX:2:250018776	3.087	3.093	3.16	3.13	68.085	67.87	1.78	1.573	145.673	143.323	62.832	61.684	0.431	0.432	0.896	0.93	2.334	2.539
IMAS-174:D08WFACXX:2:250018777	3.006	2.952	3.057	2.939	68.557	68.382	1.922	1.744	167.501	167.705	69.492	69.274	0.409	0.406	0.89	0.909	2.288	2.338
IMAS-175:D08WFACXX:2:250018778	3.27	3.404	3.371	3.522	69.01	68.851	1.436	1.139	164.787	164.585	71.846	71.798	0.435	0.436	0.901	0.947	2.257	2.204
IMAS-176:D08WFACXX:2:250018779	3.119	3.148	3.194	3.197	68.612	68.444	1.959	1.813	154.518	153.396	65.412	64.723	0.422	0.422	0.901	0.947	2.304	2.416
IMAS-177:D08WFACXX:2:250018780	3.025	2.992	3.144	3.102	69.265	69.14	2.465	2.437	161.966	161.575	69.484	69.273	0.425	0.425	0.885	0.893	2.232	2.097
IMAS-178:D08WFACXX:2:250018781	3.21	3.293	3.325	3.426	68.454	68.277	2.281	2.197	163.307	162.973	69.914	69.691	0.418	0.417	0.875	0.86	2.229	2.089
IMAS-179:D08WFACXX:2:250018782	3.239	3.353	3.334	3.466	68.54	68.37	1.438	1.144	159.866	159.228	63.461	62.468	0.391	0.385	0.896	0.928	2.241	2.17
IMAS-18:D08WFACXX:1:250018616	3.017	2.981	3.161	3.137	71.487	71.476	2.684	2.707	175.888	176.97	72.689	72.762	0.41	0.407	0.879	0.874	2.337	2.575
IMAS-180:D08WFACXX:2:250018783	3.111	3.145	3.273	3.344	69.261	69.104	2.709	2.727	160.753	160.24	66.679	66.031	0.409	0.406	0.894	0.925	2.204	1.98
IMAS-181:D08WFACXX:2:250018784	3.12	3.142	3.145	3.095	68.18	67.99	1.99	1.842	146.896	144.711	64.7	63.875	0.433	0.434	0.889	0.907	2.262	2.239
IMAS-182:D08WFACXX:2:250018785	2.974	2.909	3.113	3.048	69.19	69.051	1.993	1.847	164	163.836	69.252	68.933	0.416	0.414	0.893	0.918	2.297	2.362
IMAS-183:D08WFACXX:2:250018786	3.085	3.091	3.067	2.969	71.289	71.284	1.8	1.612	156.588	155.617	68.521	68.147	0.438	0.44	0.89	0.908	2.323	2.494
IMAS-184:D08WFACXX:2:250018787	3.226	3.325	3.278	3.347	70.851	70.812	1.849	1.656	156.05	154.871	70.256	70.069	0.445	0.448	0.893	0.919	2.238	2.141
IMAS-185:D08WFACXX:2:250018788	3.586	3.905	3.681	4.071	71.104	71.072	1.351	1.037	173.076	173.942	73.375	73.595	0.416	0.414	0.912	0.981	2.261	2.243
IMAS-186:D08WFACXX:2:250018789	3.38	3.571	3.37	3.515	72.187	72.225	1.885	1.711	166.766	166.811	78.62	79.448	0.466	0.471	0.887	0.9	2.301	2.391
IMAS-187:D08WFACXX:2:250018790	3.016	2.993	3.084	3.009	72.443	72.499	2.624	2.62	160.919	160.446	63.153	62.116	0.387	0.38	0.877	0.869	2.263	2.228
IMAS-188:D08WFACXX:2:250018791	3.042	3.024	3.155	3.122	72.559	72.611	1.022	0.622	165.368	165.28	71.276	71.146	0.425	0.424	0.895	0.929	2.277	2.296
IMAS-189:D08WFACXX:2:250018792	3.349	3.527	3.492	3.744	69.771	69.665	2.029	1.879	162.203	161.878	69.327	69.087	0.423	0.422	0.877	0.869	2.311	2.455
IMAS-19:D08WFACXX:1:250018617	2.748	2.51	2.935	2.687	66.793	66.446	2.406	2.35	150.105	148.034	62.146	60.714	0.409	0.405	0.878	0.867	2.363	2.732
IMAS-190:D08WFACXX:2:250018793	3.472	3.729	3.615	3.959	72.25	72.273	0.754	0.288	167.311	167.546	74.164	74.563	0.444	0.446	0.899	0.94	2.28	2.314
IMAS-191:D08WFACXX:2:250018794	3.256	3.371	3.462	3.684	72.661	72.726	1.788	1.613	161.735	161.292	71.021	70.918	0.438	0.44	0.881	0.879	2.242	2.165
IMAS-192:D08WFACXX:2:250018795	3.153	3.205	3.3	3.389	71.141	71.107	2.446	2.405	160.784	160.171	69.093	68.781	0.423	0.423	0.897	0.934	2.328	2.512
IMAS-193:D08WFACXX:3:250018827	3.445	3.693	3.523	3.813	71.655	71.67	1.59	1.32	156.814	155.979	70.431	70.418	0.443	0.446	0.898	0.936	2.308	2.428
IMAS-194:D08WFACXX:3:250018828	2.967	2.886	3.143	3.09	70.367	70.281	1.178	0.821	166.186	166.223	70.126	69.874	0.42	0.418	0.87	0.846	2.342	2.621
IMAS-195:D08WFACXX:3:250018829	3.292	3.432	3.514	3.768	71.467	71.455	2.656	2.666	160.51	159.756	68.546	68.057	0.422	0.42	0.9	0.941	2.204	1.958
IMAS-196:D08WFACXX:3:250018865	3.481	3.742	3.526	3.801	71.381	71.362	2.518	2.494	171.628	172.253	75.428	75.905	0.433	0.434	0.898	0.938	2.254	2.177
IMAS-197:D08WFACXX:3:250018866	3.138	3.189	3.268	3.344	72.156	72.188	1.991	1.842	160.92	160.4	70.379	70.182	0.429	0.429	0.866	0.833	2.281	2.312
IMAS-198:D08WFACXX:3:250018830	3.259	3.372	3.305	3.387	68.625	68.446	1.68	1.459	160.905	160.276	70.304	70.06	0.431	0.431	0.9	0.943	2.266	2.244
IMAS-199:D08WFACXX:3:250018867	3.172	3.255	3.261	3.341	72.73	72.804	1.915	1.742	166.269	166.298	73.527	73.682	0.438	0.439	0.876	0.865	2.269	2.264
IMAS-2:D08WFACXX:1:250018574	3.2	3.275	3.189	3.177	74.87	75.069	3.376	3.565	168.92	169.368	79.927	81.032	0.463	0.469	0.861	0.816	2.289	2.369
IMAS-20:D08WFACXX:1:250018585	3.098	3.119	3.285	3.38	71.016	71.001	2.263	2.179	169.205	169.672	75.865	76.434	0.446	0.449	0.872	0.848	2.235	2.109
IMAS-200:D08WFACXX:3:250018831	2.881	2.76	2.917	2.692	69.981	69.877	4.221	4.619	160.663	160.17	66.052	65.481	0.409	0.407	0.907	0.967	2.307	2.427
IMAS-201:D08WFACXX:3:250018868	2.827	2.635	2.941	2.691	71.799	71.805	3.17	3.343	151.418	149.274	64.903	63.698	0.422	0.421	0.873	0.847	2.234	2.072
IMAS-202:D08WFACXX:3:250018832	3.033	3.012	3.155	3.129	69.008	68.846	4.152	4.577	161.503	161.056	69.146	68.818	0.419	0.418	0.871	0.846	2.324	2.497
IMAS-203:D08WFACXX:3:250018833	3.236	3.321	3.321	3.409	69.442	69.316	2.494	2.465	171.605	172.264	75.925	76.449	0.441	0.443	0.879	0.873	2.317	2.458
IMAS-204:D08WFACXX:3:250018834	3.099	3.124	3.143	3.106	67.896	67.68	1.766	1.559	156.8	155.697	63.682	62.648	0.4	0.396	0.885	0.895	2.302	2.407
IMAS-205:D08WFACXX:3:250018835	2.919	2.817	3.036	2.902	69.279	69.139	2.938	3.018	166.683	166.82	69.788	69.547	0.415	0.413	0.879	0.873	2.314	2.439
IMAS-206:D08WFACXX:3:250018836	3.131	3.172	3.203	3.215	68.129	67.935	1.617	1.36	162.203	161.919	64.409	63.589	0.387	0.38	0.897	0.934	2.29	2.353
IMAS-207:D08WFACXX:3:250018837	3.105	3.115	3.206	3.206	68.902	68.751	1.289	0.965	163.208	162.941	65.215	64.418	0.399	0.394	0.888	0.903	2.289	2.351
IMAS-208:D08WFACXX:3:250018838	3.291	3.465	3.492	3.802	72.859	72.952	1.804	1.601	170.765	171.345	78.552	79.413	0.457	0.462	0.868	0.839	2.288	2.327
IMAS-209:D08WFACXX:3:250018869	3.173	3.251	3.37	3.542	73.087	73.183	2.159	2.037	177.722	179.281	74.814	75.212	0.418	0.416	0.893	0.92	2.246	2.167
IMAS-21:D08WFACXX:1:250018586	2.832	2.684	2.904	2.668	69.948	69.841	2.156	2.038	159.211	158.409	68.348	67.814	0.428	0.427	0.889	0.908	2.377	2.734
IMAS-210:D08WFACXX:3:250018870	3.204	3.3	3.399	3.606	73.42	73.557	2.019	1.856	174.238	175.455	74.841	75.258	0.42	0.419	0.887	0.904	2.313	2.461
IMAS-211:D08WFACXX:3:250018871	3.019	2.983	3.25	3.294	72.526	72.591	1.784	1.566	165.138	165.092	69.929	69.734	0.421	0.42	0.882	0.884	2.275	2.296
IMAS-212:D08WFACXX:3:250018839	3.055	3.046	3.202	3.219	72.599	72.67	3.494	3.732	152.272	150.671	63.106	62.059	0.403	0.399	0.882	0.881	2.244	2.128
IMAS-213:D08WFACXX:3:250018840	3.171	3.248	3.359	3.542	73.189	73.328	3.087	3.249	174.71	176.033	76.879	77.682	0.437	0.439	0.881	0.879	2.239	2.091
IMAS-214:D08WFACXX:3:250018841	3.129	3.174	3.236	3.273	71.499	71.493	3.18	3.333	162.972	162.498	70.065	69.781	0.43	0.43	0.86	0.812	2.333	2.555
IMAS-215:D08WFACXX:3:250018842	3.364	3.564	3.506	3.777	70.181	70.098	2.432	2.403	158.023	157.027	67.454	66.869	0.425	0.425	0.891	0.913	2.279	2.303
IMAS-216:D08WFACXX:3:250018843	3.216	3.302	3.364	3.498	71.992	72.006	1.907	1.722	168.297	168.625	77.283	77.991	0.455	0.46	0.887	0.901	2.233	2.088
IMAS-217:D08WFACXX:3:250018872	3.333	3.52	3.366	3.537	73.624	73.769	1.676	1.432	169.161	169.642	79.253	80.217	0.464	0.469	0.878	0.87	2.349	2.628
IMAS-218:D08WFACXX:3:250018844	3.042	3.028	3.163	3.137	74.32	74.521	1.611	1.318	162.681	162.201	74.285	74.606	0.448	0.451	0.886	0.897	2.274	2.286
IMAS-219:D08WFACXX:3:250018845	2.833	2.664	2.971	2.766	72.981	73.075	3.123	3.265	168.2	168.452	71.197	71.083	0.417	0.415	0.9	0.943	2.295	2.375
IMAS-22:D08WFACXX:1:250018587	3.012	2.941	3.114	2.992	73.303	73.48	2.74	2.791	165.779	165.668	68.297	67.295	0.411	0.405	0.883	0.895	2.25	2.117
IMAS-220:D08WFACXX:3:250018846	3.193	3.293	3.223	3.262	72.163	72.204	2.154	2.029	167.275	167.392	72.492	72.525	0.428	0.427	0.887	0.903	2.256	2.187
IMAS-221:D08WFACXX:3:250018847	2.792	2.594	2.993	2.812	74.335	74.519	3.187	3.357	163.03	162.816	76.183	76.802	0.463	0.469	0.868	0.836	2.32	2.495
IMAS-222:D08WFACXX:3:250018848	3.408	3.634	3.372	3.532	69.964	69.868	2.311	2.239	171.751	172.613	76.109	76.739	0.437	0.439	0.887	0.9	2.262	2.239
IMAS-224:D08WFACXX:3:250018850	3.388	3.602	3.548	3.873	71.507	71.506	3.046	3.166	173.926	174.992	72.396	72.502	0.417	0.415	0.88	0.877	2.306	2.416
IMAS-225:D08WFACXX:3:250018851	3.079	3.1	3.161	3.156	72.874	72.981	2.102	1.973	167.066	167.386	70.005	69.87	0.415	0.413	0.87	0.845	2.23	2.092
IMAS-226:D08WFACXX:3:250018852	2.986	2.941	3.077	2.991	71.517	71.513	2.503	2.477	158.255	157.322	65.495	64.698	0.408	0.405	0.885	0.896	2.335	2.554
IMAS-227:D08WFACXX:3:250018853	2.841	2.684	3.085	2.99	74.073	74.232	1.805	1.592	169.442	169.909	69.135	68.822	0.406	0.402	0.885	0.894	2.268	2.253
IMAS-228:D08WFACXX:3:250018854	3.208	3.307	3.361	3.53	71.782	71.798	2.59	2.595	150.933	148.94	59.597	57.885	0.395	0.389	0.889	0.909	2.275	2.283
IMAS-229:D08WFACXX:3:250018855	2.928	2.827	3.055	2.937	71.714	71.727	2.619	2.637	159.572	158.86	62.971	61.811	0.392	0.386	0.883	0.888	2.288	2.347
IMAS-23:D08WFACXX:1:250018588	3.077	3.091	3.037	2.873	68.092	67.761	3.028	3.177	160.083	159.163	57.874	55.199	0.364	0.349	0.878	0.865	2.174	1.771
IMAS-230:D08WFACXX:3:250018856	2.808	2.616	2.943	2.702	73.391	73.503	1.835	1.639	160.183	159.473	70.094	69.897	0.43	0.43	0.882	0.884	2.221	2.075
IMAS-231:D08WFACXX:3:250018857	3.165	3.234	3.267	3.336	72.277	72.324	2.665	2.681	165.007	164.857	72.084	72.097	0.431	0.432	0.89	0.911	2.194	1.911
IMAS-232:D08WFACXX:3:250018873	3.082	3.082	3.253	3.291	72.551	72.632	2.452	2.411	158.726	157.924	66.164	65.43	0.413	0.411	0.889	0.905	2.256	2.21
IMAS-233:D08WFACXX:3:250018858	3.062	3.061	3.375	3.543	75.031	75.241	2.082	1.94	169.357	169.689	73.243	73.294	0.425	0.424	0.874	0.859	2.268	2.24
IMAS-234:D08WFACXX:3:250018874	2.924	2.816	2.975	2.78	72.011	72.052	2.21	2.11	165.555	165.581	72.878	73.016	0.435	0.436	0.877	0.867	2.309	2.435
IMAS-236:D08WFACXX:3:250018860	3.132	3.173	3.271	3.347	70.25	70.157	2.289	2.201	159.711	159.003	61.088	59.762	0.38	0.373	0.886	0.899	2.232	2.1
IMAS-237:D08WFACXX:3:250018861	3.188	3.283	3.334	3.481	72.561	72.634	2.367	2.303	151.84	150.132	64.385	63.385	0.417	0.415	0.879	0.874	2.207	1.994
IMAS-238:D08WFACXX:3:250018862	3.177	3.269	3.253	3.329	71.698	71.712	2.635	2.635	161.155	160.56	62.47	61.138	0.381	0.372	0.893	0.926	2.261	2.211
IMAS-239:D08WFACXX:3:250018863	2.989	2.924	3.28	3.355	75.815	76.078	2.704	2.717	165.401	165.222	74.775	75.067	0.443	0.445	0.847	0.768	2.263	2.224
IMAS-24:D08WFACXX:1:250018589	2.961	2.883	3.077	2.97	72.764	72.826	2.171	2.061	164.845	164.797	72.569	72.704	0.435	0.437	0.875	0.861	2.251	2.197
IMAS-240:D08WFACXX:3:250018864	3.052	3.04	3.242	3.289	75.32	75.558	2.663	2.68	166.311	166.352	73.154	73.267	0.435	0.435	0.867	0.835	2.224	2.059
IMAS-241:D08WFACXX:3:250018875	3.313	3.83	3.47	4.116	74.033	74.504	1.307	0.257	171.839	174.134	76.017	77.591	0.436	0.44	0.887	0.924	2.27	2.297
IMAS-242:D08WFACXX:3:250018876	2.858	2.706	3.021	2.868	70.974	70.942	1.905	1.718	165.002	164.825	69.722	69.371	0.418	0.416	0.869	0.843	2.246	2.151
IMAS-243:D08WFACXX:3:250018877	3.149	3.205	3.31	3.431	73.252	73.359	2.063	1.933	169.508	169.972	70.601	70.41	0.415	0.413	0.868	0.837	2.291	2.36
IMAS-244:D08WFACXX:3:250018878	2.796	2.603	3.096	3.013	72.377	72.427	3.168	3.327	171.183	171.84	67.036	66.367	0.39	0.384	0.862	0.817	2.207	1.972
IMAS-245:D08WFACXX:3:250018879	3.228	3.328	3.298	3.379	70.487	70.424	3.181	3.34	165.059	164.897	67.58	66.989	0.407	0.404	0.882	0.883	2.308	2.43
IMAS-246:D08WFACXX:3:250018880	2.994	2.874	3.173	3.14	72.417	72.521	3.208	3.555	170.593	171.727	73.285	73.591	0.428	0.428	0.865	0.789	2.261	2.161
IMAS-247:D08WFACXX:3:250018881	2.784	2.561	3.092	2.985	71.391	71.374	2.924	3.011	171.286	171.995	75.574	76.085	0.432	0.433	0.867	0.831	2.337	2.563
IMAS-248:D08WFACXX:3:250018882	3.082	3.083	3.144	3.098	70.537	70.463	2.602	2.598	164.474	164.317	68.248	67.73	0.409	0.406	0.872	0.847	2.247	2.154
IMAS-249:D08WFACXX:3:250018883	2.993	2.913	3.167	3.122	70.942	70.904	2.697	2.725	167.676	167.892	72.663	72.758	0.43	0.431	0.86	0.799	2.324	2.523
IMAS-25:D08WFACXX:1:250018618	3.038	3.011	3.086	2.973	71.01	70.979	2.144	2.001	163.378	163.209	65.97	65.201	0.402	0.398	0.883	0.889	2.3	2.425
IMAS-250:D08WFACXX:3:250018884	2.835	2.649	2.947	2.702	70.513	70.446	2.685	2.709	164.38	164.266	67.603	67.092	0.409	0.406	0.875	0.862	2.239	2.146
IMAS-251:D08WFACXX:3:250018885	2.939	2.792	3.157	3.103	72.321	72.388	1.972	1.793	161.182	160.3	68.687	68.049	0.419	0.417	0.887	0.902	2.264	2.228
IMAS-252:D08WFACXX:3:250018886	2.961	2.857	3.158	3.142	70.01	69.893	2.388	2.323	169.536	170.456	70.274	70.25	0.406	0.402	0.876	0.856	2.237	2.126
IMAS-253:D08WFACXX:3:250018887	2.958	2.889	3.005	2.843	70.525	70.463	2.553	2.542	167.132	167.359	72.513	72.642	0.426	0.426	0.882	0.883	2.265	2.245
IMAS-254:D08WFACXX:3:250018888	3.03	2.999	3.248	3.306	71.983	72.014	3.017	3.136	166.891	166.972	69.288	68.948	0.411	0.409	0.863	0.815	2.235	2.074
IMAS-255:D08WFACXX:3:250018889	3.146	3.189	3.237	3.276	71.297	71.277	3.189	3.357	173.758	174.674	74.095	74.329	0.425	0.424	0.881	0.88	2.24	2.121
IMAS-256:D08WFACXX:3:250018890	3.183	3.282	3.337	3.487	72.085	72.112	2.187	2.063	165.011	164.972	69.684	69.412	0.418	0.416	0.875	0.858	2.282	2.316
IMAS-257:D08WFACXX:3:250018891	3.024	2.972	3.194	3.182	71.438	71.435	2.648	2.671	163.848	163.538	71.908	71.92	0.437	0.439	0.888	0.906	2.26	2.204
IMAS-258:D08WFACXX:3:250018892	3.03	3.001	3.118	3.045	71.439	71.429	2.28	2.186	157.67	156.598	67.604	67.03	0.423	0.422	0.875	0.861	2.233	2.087
IMAS-259:D08WFACXX:3:250018893	3.046	3.034	3.167	3.159	71.264	71.242	2.151	2.059	164.423	164.337	72.652	72.804	0.434	0.435	0.874	0.86	2.203	1.998
IMAS-26:D08WFACXX:1:250018590	2.933	2.833	2.974	2.759	69.328	69.174	2.585	2.564	150.616	148.499	57.281	55.022	0.376	0.366	0.89	0.912	2.27	2.293
IMAS-260:D08WFACXX:3:250018894	3.212	3.317	3.335	3.481	71.839	71.857	2.609	2.622	168.365	168.626	72.657	72.735	0.428	0.428	0.866	0.832	2.289	2.367
IMAS-261:D08WFACXX:3:250018895	3.026	2.995	3.152	3.114	70.855	70.825	1.946	1.763	160.051	159.333	73.11	73.346	0.452	0.456	0.882	0.885	2.25	2.192
IMAS-262:D08WFACXX:3:250018896	3.273	3.451	3.332	3.472	71.032	70.961	2.018	1.815	165.819	165.698	69.933	69.521	0.415	0.412	0.882	0.886	2.254	2.206
IMAS-263:D08WFACXX:3:250018897	3.015	2.912	3.161	3.089	72.546	72.673	2.665	2.714	162.804	161.963	69.721	69.104	0.419	0.416	0.889	0.92	2.322	2.576
IMAS-264:D08WFACXX:3:250018898	2.967	2.863	3.067	2.921	69.786	69.643	2.475	2.445	160.308	159.434	67.948	67.279	0.418	0.416	0.877	0.862	2.25	2.157
IMAS-265:D08WFACXX:3:250018899	2.876	2.655	3.014	2.76	71.779	71.795	2.121	1.926	163.915	163.467	70.825	70.609	0.428	0.428	0.871	0.833	2.32	2.528
IMAS-266:D08WFACXX:3:250018900	3.145	3.275	3.334	3.609	72.247	72.37	2.511	2.459	168.496	169.544	73.389	73.991	0.426	0.425	0.881	0.874	2.279	2.322
IMAS-267:D08WFACXX:3:250018901	3.063	3.051	3.247	3.313	72.527	72.611	3.492	3.807	173.218	174.501	74.462	74.936	0.423	0.422	0.872	0.842	2.298	2.401
IMAS-268:D08WFACXX:3:250018902	3.001	2.694	3.084	2.581	67.347	65.699	3.113	3.935	166.829	167.77	70.688	69.825	0.418	0.409	0.886	0.954	2.252	2.014
IMAS-27:D08WFACXX:1:250018591	3.091	3.094	3.295	3.368	73.415	73.531	3.439	3.683	165.903	165.955	67.964	67.487	0.41	0.407	0.872	0.848	2.269	2.269
IMAS-270:D08WFACXX:3:250018904	3.189	3.384	3.338	3.659	71.113	71.052	2.308	2.121	156.802	154.212	70.435	70.125	0.445	0.452	0.871	0.813	2.264	2.194
IMAS-271:D08WFACXX:3:250018905	3.315	3.592	3.355	3.585	71.97	72.026	2.192	2.014	163.419	162.983	73.911	74.411	0.45	0.456	0.893	0.939	2.278	2.321
IMAS-272:D08WFACXX:3:250018906	2.952	2.823	2.958	2.655	71.518	71.528	2.86	2.977	170.336	171.188	71.759	71.847	0.414	0.411	0.884	0.892	2.227	2.042
IMAS-273:D08WFACXX:3:250018907	3.091	3.104	3.207	3.223	71.722	71.747	3.147	3.454	166.097	166.339	70.894	70.81	0.419	0.417	0.891	0.935	2.237	1.97
IMAS-274:D08WFACXX:3:250018908	2.86	2.56	3.005	2.724	70.133	69.932	3.857	4.537	165.119	164.916	65.478	63.844	0.392	0.381	0.883	0.893	2.315	2.531
IMAS-275:D08WFACXX:3:250018909	2.956	2.87	3.104	3.021	71.628	71.635	2.999	3.12	162.117	161.782	66.278	65.589	0.404	0.4	0.883	0.886	2.299	2.401
IMAS-276:D08WFACXX:3:250018910	3	2.887	3.147	3.067	71.209	71.152	2.716	2.801	169.04	169.767	72.488	72.594	0.424	0.422	0.873	0.834	2.258	2.18
IMAS-277:D08WFACXX:3:250018911	3.188	3.304	3.26	3.325	70.504	70.395	2.728	2.783	164.894	164.657	71.067	70.939	0.427	0.427	0.875	0.853	2.295	2.415
IMAS-278:D08WFACXX:3:250018912	2.812	2.579	3.057	2.912	71.238	71.201	3.695	4.095	160.911	160.043	67.728	66.931	0.412	0.408	0.88	0.876	2.257	2.2
IMAS-279:D08WFACXX:3:250018913	3.309	3.596	3.401	3.737	71.213	71.146	3.027	3.272	166.139	166.31	72.518	72.744	0.431	0.432	0.88	0.876	2.256	2.195
IMAS-28:D08WFACXX:1:250018592	2.912	2.807	3.003	2.843	72.66	72.717	2.793	2.867	163.107	162.779	68.86	68.491	0.417	0.415	0.872	0.851	2.282	2.322
IMAS-280:D08WFACXX:3:250018914	3.006	2.956	3.224	3.264	70.968	70.937	3.737	4.063	167.674	167.961	70.107	69.869	0.417	0.415	0.903	0.955	2.251	2.173
IMAS-281:D08WFACXX:3:250018915	3.009	2.692	3.115	2.697	71.349	71.28	3.044	3.779	158.788	153.635	65.157	60.103	0.402	0.378	0.867	0.672	2.256	2.061
IMAS-282:D08WFACXX:3:250018916	3.041	2.947	3.124	2.912	72.024	72.137	2.69	2.773	166.862	167.352	74.652	75.999	0.441	0.45	0.882	0.888	2.246	2.051
IMAS-283:D08WFACXX:3:250018917	2.854	2.504	3.042	2.784	73.101	73.336	2.505	2.451	168.624	169.547	74.233	74.928	0.437	0.44	0.884	0.895	2.297	2.434
IMAS-284:D08WFACXX:3:250018918	2.935	2.742	3.112	2.982	73.572	73.816	4.056	4.837	173.099	174.839	75.674	76.565	0.434	0.435	0.864	0.783	2.264	2.217
IMAS-285:D08WFACXX:3:250018919	3.038	3.004	3.144	3.075	70.51	70.373	3.562	4.004	158.675	157.192	66.171	64.946	0.413	0.409	0.89	0.926	2.275	2.307
IMAS-286:D08WFACXX:3:250018920	2.825	2.624	3.079	2.952	71.377	71.357	3.531	3.83	161.025	160.218	67.071	66.255	0.411	0.407	0.869	0.834	2.208	1.952
IMAS-287:D08WFACXX:3:250018921	3	2.84	3.196	3.147	69.693	69.438	3.572	4.126	156.567	154.462	63.862	61.913	0.403	0.395	0.887	0.912	2.28	2.332
IMAS-288:D08WFACXX:3:250018922	3.134	3.258	3.233	3.327	69.92	69.658	3.89	4.819	166.794	167.14	68.89	67.998	0.411	0.404	0.883	0.893	2.265	2.25
IMAS-289:D08WFACXX:4:250018954	2.966	2.874	3.164	3.136	69.809	69.676	3.448	3.755	159.236	158.198	70.595	70.403	0.438	0.44	0.887	0.904	2.23	2.066
IMAS-29:D08WFACXX:1:250018593	3.182	3.262	3.227	3.251	72.211	72.247	2.62	2.615	170.663	171.232	74.55	74.861	0.433	0.433	0.879	0.875	2.244	2.152
IMAS-290:D08WFACXX:4:250018955	2.863	2.723	2.987	2.803	69.472	69.344	3.867	4.215	158.542	157.703	66.004	65.309	0.407	0.404	0.879	0.874	2.244	2.149
IMAS-291:D08WFACXX:4:250018956	3.349	3.538	3.304	3.397	68.943	68.776	2.329	2.267	159.779	158.989	69.833	69.494	0.432	0.433	0.897	0.934	2.229	2.088
IMAS-292:D08WFACXX:4:250018992	3.153	3.237	3.226	3.271	71.27	71.248	1.99	1.75	169.505	170.212	73.514	73.857	0.428	0.428	0.894	0.934	2.223	2.038
IMAS-293:D08WFACXX:4:250018993	3.159	3.219	3.188	3.176	70.874	70.842	2.701	2.727	166.41	166.416	70.43	70.269	0.417	0.416	0.886	0.896	2.324	2.492
IMAS-294:D08WFACXX:4:250018957	3.181	3.245	3.256	3.302	70.26	70.183	3.091	3.229	162.401	161.994	69.861	69.572	0.424	0.423	0.885	0.891	2.256	2.215
IMAS-295:D08WFACXX:4:250018994	3.121	3.153	3.124	3.067	70.756	70.7	2.349	2.274	171.091	171.829	72.769	72.923	0.421	0.42	0.89	0.909	2.243	2.168
IMAS-296:D08WFACXX:4:250018958	3.195	3.285	3.323	3.447	68.837	68.633	3.768	4.112	163.53	163.212	64.869	63.901	0.391	0.384	0.889	0.909	2.294	2.394
IMAS-297:D08WFACXX:4:250018995	3.174	3.345	3.26	3.394	71.245	71.2	2.469	2.424	168.327	169.133	72.023	72.226	0.424	0.423	0.876	0.846	2.244	2.089
IMAS-298:D08WFACXX:4:250018959	2.981	2.923	3.133	3.072	70.973	70.941	2.671	2.684	162.169	161.816	66.341	65.822	0.403	0.401	0.877	0.871	2.274	2.309
IMAS-299:D08WFACXX:4:250018960	2.935	2.826	3.008	2.835	67.221	66.948	2.754	2.803	165.044	164.966	67.767	67.297	0.406	0.403	0.878	0.871	2.407	2.866
IMAS-3:D08WFACXX:1:250018575	3.29	3.434	3.322	3.434	71.645	71.648	2.726	2.75	164.936	164.875	73.203	73.408	0.436	0.437	0.896	0.929	2.311	2.454
IMAS-300:D08WFACXX:4:250018961	3.247	3.415	3.361	3.562	71.149	71.12	3.23	3.453	173.513	174.78	72.412	72.511	0.414	0.412	0.872	0.843	2.245	2.132
IMAS-301:D08WFACXX:4:250018962	3.158	3.21	3.264	3.314	72.096	72.125	3.119	3.277	176.578	178.049	73.182	73.385	0.41	0.407	0.882	0.884	2.269	2.278
IMAS-302:D08WFACXX:4:250018963	3.122	3.15	3.316	3.433	71.643	71.656	3.178	3.331	177.613	179.129	68.579	68.254	0.383	0.376	0.87	0.844	2.273	2.278
IMAS-303:D08WFACXX:4:250018964	3.067	3.06	3.17	3.143	69.639	69.522	3.477	3.748	171.131	171.876	69.621	69.384	0.403	0.4	0.874	0.858	2.258	2.193
IMAS-304:D08WFACXX:4:250018965	3.171	3.319	3.292	3.459	70.56	70.402	3.049	3.351	168.144	168.674	73.064	73.403	0.432	0.433	0.88	0.871	2.251	2.172
IMAS-305:D08WFACXX:4:250018996	3.304	3.49	3.231	3.269	69.919	69.788	2.807	2.879	168.37	168.774	72.006	72.067	0.421	0.42	0.889	0.911	2.262	2.196
IMAS-306:D08WFACXX:4:250018997	3.027	2.916	3.16	3.074	72.227	72.344	3.238	3.663	167.987	168.888	68.79	68.015	0.405	0.396	0.879	0.865	2.305	2.47
IMAS-307:D08WFACXX:4:250018998	3.13	3.168	3.226	3.244	70.476	70.375	2.941	3.047	175.091	176.323	69.149	68.631	0.394	0.387	0.886	0.899	2.268	2.222
IMAS-308:D08WFACXX:4:250018966	3.278	3.43	3.368	3.541	70.378	70.302	3.325	3.522	177.205	178.61	71.146	71.062	0.398	0.393	0.901	0.948	2.239	2.142
IMAS-309:D08WFACXX:4:250018967	2.991	2.93	3.13	3.07	70.514	70.435	2.611	2.611	162.766	162.412	69.238	68.933	0.421	0.42	0.878	0.867	2.29	2.385
IMAS-31:D08WFACXX:1:250018595	3.26	3.419	3.322	3.467	71.357	71.326	1.654	1.348	154.855	153.167	74.171	74.5	0.475	0.484	0.893	0.929	2.274	2.296
IMAS-310:D08WFACXX:4:250018968	2.916	2.801	3.041	2.895	70.749	70.696	2.971	3.086	159.649	159.069	62.966	61.998	0.393	0.387	0.869	0.838	2.255	2.212
IMAS-311:D08WFACXX:4:250018969	3.116	3.159	3.204	3.228	72.464	72.54	3.267	3.516	154.641	152.909	63.766	62.447	0.405	0.401	0.886	0.897	2.241	2.108
IMAS-312:D08WFACXX:4:250018970	3.198	3.285	3.242	3.281	72.3	72.35	2.373	2.307	167.856	168.117	71.285	71.198	0.423	0.423	0.895	0.929	2.249	2.166
IMAS-313:D08WFACXX:4:250018999	3.075	3.08	3.238	3.304	71.164	71.113	3.365	3.781	164.586	164.484	67.763	66.82	0.407	0.4	0.881	0.879	2.255	2.189
IMAS-314:D08WFACXX:4:250018971	3.041	2.815	3.167	2.959	72.109	72.273	2.891	3.357	165.321	164.934	71.128	70.867	0.428	0.429	0.87	0.709	2.261	2.193
IMAS-315:D08WFACXX:4:250018972	3.068	3.076	3.169	3.16	70.04	69.945	3.043	3.162	161.481	161.022	66.505	65.884	0.407	0.404	0.885	0.893	2.242	2.125
IMAS-316:D08WFACXX:4:250018973	3.143	3.212	3.176	3.122	70.09	69.928	3.372	3.813	165.558	165.554	65.995	64.61	0.393	0.382	0.89	0.927	2.301	2.44
IMAS-317:D08WFACXX:4:250018974	2.877	2.732	3.029	2.87	68.511	68.295	2.677	2.696	177.64	179.305	69.863	69.587	0.393	0.387	0.882	0.885	2.304	2.426
IMAS-318:D08WFACXX:4:250018975	2.711	2.375	2.831	2.408	72.64	72.733	2.755	2.815	173.028	174.333	74.416	74.919	0.427	0.427	0.851	0.757	2.236	2.12
IMAS-319:D08WFACXX:4:250018976	3.073	3.084	3.25	3.39	72.001	72.057	3.522	4.187	155.533	152.269	64.071	61.522	0.405	0.396	0.866	0.774	2.237	2.051
IMAS-32:D08WFACXX:1:250018596	3.241	3.366	3.168	3.143	71.049	71.002	2.611	2.602	163.734	163.379	71.728	71.64	0.436	0.438	0.879	0.875	2.228	2.028
IMAS-320:D08WFACXX:4:250018977	3.166	3.355	3.292	3.519	71.104	71.035	4.3	5.667	169.301	170.589	69.691	68.945	0.405	0.394	0.884	0.9	2.241	1.989
IMAS-321:D08WFACXX:4:250018978	2.626	2.319	2.86	2.565	72.495	72.567	2.709	2.749	154.613	153.206	70.877	70.76	0.455	0.46	0.874	0.856	2.267	2.236
IMAS-322:D08WFACXX:4:250018979	3.172	3.269	3.405	3.65	72.252	72.302	2.155	2.02	167.776	168.155	69.099	68.8	0.405	0.401	0.878	0.87	2.229	2.089
IMAS-323:D08WFACXX:4:250018980	3.265	3.435	3.397	3.624	72.445	72.508	2.723	2.8	164.582	164.327	68.356	67.678	0.417	0.414	0.875	0.857	2.222	2.029
IMAS-324:D08WFACXX:4:250018981	3.129	3.2	3.294	3.441	71.128	71.065	3.145	3.45	165.267	165.296	72.107	72.21	0.432	0.433	0.889	0.926	2.264	2.244
IMAS-325:D08WFACXX:4:250018982	2.93	2.765	3.185	3.153	72.756	72.851	2.05	1.823	180.403	183.06	80.452	82.059	0.437	0.439	0.885	0.898	2.313	2.513
IMAS-326:D08WFACXX:4:250018983	3.092	3.122	3.317	3.505	72.936	73.112	3.146	3.509	165.465	165.419	73.127	73.514	0.438	0.441	0.881	0.879	2.239	2.091
IMAS-327:D08WFACXX:4:250018984	3.046	2.999	3.224	3.275	72.659	72.797	3.029	3.265	169.421	170.234	71.372	71.189	0.415	0.41	0.871	0.823	2.313	2.662
IMAS-328:D08WFACXX:4:250019000	2.969	2.858	3.212	3.244	72.79	72.915	2.792	2.857	163.391	162.996	72.741	72.893	0.445	0.448	0.897	0.951	2.262	2.225
IMAS-329:D08WFACXX:4:250018985	3.257	3.428	3.244	3.314	72.452	72.523	2.876	2.982	162.378	161.765	69.331	68.888	0.422	0.421	0.879	0.87	2.329	2.559
IMAS-33:D08WFACXX:1:250018597	3.508	3.788	3.574	3.891	70.301	70.224	2.14	2.019	159.179	158.358	71.059	70.973	0.44	0.442	0.894	0.926	2.28	2.318
IMAS-330:D08WFACXX:4:250019001	3.099	3.174	3.276	3.606	73.5	74.214	2.266	1.716	181.858	193.824	83.036	91.73	0.449	0.469	0.884	0.921	2.263	2.151
IMAS-331:D08WFACXX:4:250018986	3.131	3.18	3.472	3.752	69.402	69.243	3.535	3.821	159.905	159.03	71.616	71.518	0.43	0.43	0.888	0.906	2.261	2.213
IMAS-332:D08WFACXX:4:250018987	3.135	3.278	3.259	3.451	70.285	70.079	2.143	1.848	170.529	171.997	83.23	86.69	0.481	0.501	0.894	0.961	2.305	2.57
IMAS-334:D08WFACXX:4:250018989	2.983	2.889	3.059	2.892	72.947	73.114	2.887	3.033	157.2	155.172	66.9	65.815	0.418	0.416	0.878	0.863	2.287	2.349
IMAS-335:D08WFACXX:4:250018990	2.899	2.773	3.09	2.989	71.378	71.381	2.591	2.593	158.523	157.745	69.073	68.86	0.43	0.431	0.89	0.911	2.256	2.235
IMAS-336:D08WFACXX:4:250018991	3.031	2.985	3.107	2.99	70.746	70.659	2.984	3.146	156.718	155.106	62.73	60.927	0.398	0.391	0.857	0.767	2.278	2.299
IMAS-337:D08WFACXX:4:250019002	3.12	3.154	3.277	3.361	73.278	73.381	2.549	2.537	166.224	166.229	70.365	70.171	0.422	0.421	0.864	0.824	2.242	2.143
IMAS-338:D08WFACXX:4:250019003	3.119	3.164	3.286	3.403	72.085	72.134	2.664	2.735	165.576	165.462	72.935	73.118	0.434	0.435	0.871	0.835	2.301	2.419
IMAS-339:D08WFACXX:4:250019004	3.155	3.276	3.305	3.483	72.846	73.052	3.115	3.463	174.443	176.931	73.976	74.683	0.42	0.418	0.887	0.915	2.234	2.07
IMAS-34:D08WFACXX:1:250018598	3.023	2.991	3.119	3.06	71.175	71.16	2.664	2.675	162.812	162.493	75.491	76.001	0.458	0.462	0.898	0.936	2.321	2.502
IMAS-340:D08WFACXX:4:250019005	2.855	2.531	3.058	2.829	71.884	71.925	2.284	2.142	161.155	160.099	74.162	74.829	0.455	0.464	0.879	0.868	2.239	2.061
IMAS-341:D08WFACXX:4:250019006	2.962	2.788	3.133	3.039	74.279	74.704	2.884	3.068	169.111	170.084	69.798	69.214	0.408	0.401	0.882	0.887	2.276	2.307
IMAS-342:D08WFACXX:4:250019007	3.192	3.267	3.209	3.219	70.208	70.128	3.29	3.478	160.406	159.781	70.634	70.472	0.432	0.433	0.89	0.909	2.237	2.132
IMAS-343:D08WFACXX:4:250019008	3.007	2.913	3.25	3.338	72.867	73.055	2.566	2.578	177.975	181.072	77.035	78.445	0.43	0.431	0.88	0.87	2.243	2.103
IMAS-344:D08WFACXX:4:250019009	2.965	2.759	3.139	3.024	75.262	75.845	2.597	2.603	185.716	191.434	85.513	89.645	0.457	0.468	0.867	0.785	2.262	2.249
IMAS-345:D08WFACXX:4:250019010	2.917	2.772	3.102	2.993	77.113	77.606	3.373	3.658	178.149	180.356	86.626	89.511	0.484	0.497	0.86	0.79	2.283	2.345
IMAS-346:D08WFACXX:4:250019011	3.185	3.319	3.314	3.502	70.572	70.466	2.928	3.081	185.878	190.104	95.063	100.589	0.508	0.53	0.864	0.795	2.243	2.096
IMAS-347:D08WFACXX:4:250019012	2.694	2.362	3	2.754	73.754	73.92	3.939	4.37	184.182	186.83	87.793	90.178	0.47	0.478	0.852	0.767	2.239	2.127
IMAS-348:D08WFACXX:4:250019013	3.172	3.232	3.275	3.344	74.246	74.436	3.508	3.758	178.239	179.921	80.992	82.249	0.453	0.457	0.873	0.854	2.26	2.22
IMAS-349:D08WFACXX:4:250019014	3.006	2.723	3.224	3.351	72.089	72.237	4.188	6.772	178.628	188.601	85.75	96.865	0.471	0.513	0.883	0.911	2.261	2.18
IMAS-35:D08WFACXX:1:250018599	3.055	3.041	3.092	2.96	69.297	69.035	2.797	2.869	166.591	166.791	72.513	72.74	0.432	0.433	0.884	0.899	2.282	2.367
IMAS-350:D08WFACXX:4:250019015	2.584	2.035	2.882	2.44	75.82	76.225	4.111	4.727	178.622	180.933	81.404	83.246	0.454	0.461	0.862	0.793	2.219	2.021
IMAS-351:D08WFACXX:4:250019016	2.812	2.577	2.984	2.763	73.703	73.87	2.756	2.831	176.725	178.6	80.278	81.842	0.45	0.455	0.868	0.83	2.293	2.376
IMAS-354:D08WFACXX:4:250019019	3.052	3.046	3.207	3.231	72.968	73.061	3.278	3.462	173.441	174.357	83.464	84.952	0.478	0.487	0.878	0.87	2.294	2.376
IMAS-355:D08WFACXX:4:250019020	2.765	2.269	2.976	2.606	76.627	77.429	2.74	2.841	182.164	186.969	82.571	85.865	0.456	0.467	0.884	0.893	2.279	2.32
IMAS-359:D08WFACXX:4:250019024	2.918	2.602	3.046	2.717	72.791	72.983	3.016	3.3	164.284	164.022	75.009	76.093	0.453	0.462	0.831	0.555	2.212	1.912
IMAS-36:D08WFACXX:1:250018600	2.959	2.865	3.121	3.031	69.434	69.27	2.268	2.159	160.023	159.159	68.169	67.546	0.429	0.43	0.881	0.879	2.316	2.597
IMAS-361:D08WFACXX:4:250019026	2.92	2.777	3.014	2.811	75.672	76.023	3.362	3.645	172.336	173.366	81.759	83.534	0.477	0.488	0.886	0.9	2.248	2.155
IMAS-362:D08WFACXX:4:250019027	3.04	3.022	3.124	3.065	72.45	72.513	3.31	3.514	162.312	162.007	72.438	72.585	0.442	0.444	0.883	0.887	2.259	2.22
IMAS-363:D08WFACXX:4:250019028	3.352	3.558	3.472	3.746	71.642	71.656	3.035	3.156	172.86	173.892	74.731	75.253	0.428	0.428	0.889	0.907	2.274	2.269
IMAS-364:D08WFACXX:4:250019029	3.029	2.957	3.124	2.996	74.702	75.186	2.182	1.942	181.096	185.617	82.48	85.701	0.454	0.464	0.853	0.693	2.2	1.852
IMAS-365:D08WFACXX:4:250019030	3.045	3.023	3.21	3.233	73.655	73.841	2.385	2.311	170.942	171.842	73.591	73.949	0.427	0.427	0.875	0.855	2.244	2.13
IMAS-366:D08WFACXX:4:250019031	3.061	3.04	3.175	3.13	75.403	75.989	2.619	2.608	173.655	175.903	81.796	84.864	0.459	0.47	0.879	0.867	2.31	2.626
IMAS-367:D08WFACXX:4:250019032	2.686	2.049	2.934	2.355	74.068	74.44	2.976	3.224	169.979	171.035	80.865	83.523	0.465	0.478	0.878	0.862	2.325	2.76
IMAS-368:D08WFACXX:4:250019033	3.136	3.231	3.18	3.164	71.992	72.032	3.275	3.644	182.107	186.086	77.643	79.151	0.422	0.421	0.886	0.906	2.26	2.203
IMAS-369:D08WFACXX:4:250019034	2.951	2.871	3.032	2.891	71.349	71.338	2.716	2.753	165.034	165.004	70.494	70.322	0.424	0.423	0.885	0.893	2.249	2.164
IMAS-37:D08WFACXX:1:250018601	3.049	3.042	3.183	3.188	72.57	72.621	1.509	1.228	162.734	162.269	75.096	75.427	0.453	0.457	0.883	0.888	2.295	2.368
IMAS-370:D08WFACXX:4:250019035	2.947	2.822	3.227	3.272	74.748	75.064	2.849	2.946	176.339	178.254	80.437	82.094	0.449	0.455	0.859	0.781	2.331	2.565
IMAS-371:D08WFACXX:4:250019036	3.195	3.308	3.199	3.211	72.774	72.88	2.867	2.972	178.915	180.956	83.393	85.291	0.46	0.467	0.892	0.923	2.256	2.194
IMAS-372:D08WFACXX:4:250019037	2.997	2.855	3.111	2.95	73.966	74.347	1.947	1.539	166.528	166.748	80.552	83.336	0.48	0.501	0.861	0.746	2.209	1.887
IMAS-373:D08WFACXX:4:250019038	3.025	2.976	3.167	3.144	74.463	74.86	2.811	2.925	159.81	158.183	74.942	75.784	0.46	0.471	0.884	0.897	2.305	2.505
IMAS-374:D08WFACXX:4:250019039	3.091	3.098	3.23	3.273	75.02	75.487	2.93	3.128	174.78	177.066	80.197	82.358	0.454	0.462	0.863	0.779	2.275	2.273
IMAS-375:D08WFACXX:4:250019040	3.015	2.979	3.2	3.215	76.662	76.99	2.788	2.848	164.831	164.786	79.664	80.731	0.475	0.482	0.881	0.88	2.288	2.369
IMAS-376:D08WFACXX:4:250019041	2.895	2.724	3.078	2.922	74.225	74.445	2.874	2.973	175.705	177.397	79.618	80.97	0.447	0.451	0.872	0.844	2.31	2.459
IMAS-377:D08WFACXX:4:250019042	3.13	3.203	3.261	3.36	74.302	74.702	2.807	2.944	171.575	173.127	77.348	79.001	0.445	0.452	0.876	0.844	2.298	2.436
IMAS-378:D08WFACXX:4:250019043	2.918	2.764	3.025	2.827	71.967	72.007	2.75	2.82	169.199	169.805	73.787	74.138	0.43	0.43	0.861	0.8	2.296	2.372
IMAS-379:D08WFACXX:4:250019044	2.846	2.676	2.876	2.555	67.295	66.996	2.659	2.68	158.294	157.368	66.475	65.746	0.41	0.407	0.889	0.907	2.31	2.422
IMAS-38:D08WFACXX:1:250018602	3.169	3.233	3.169	3.149	68.334	68.132	3.064	3.172	144.912	142.433	61.246	59.789	0.414	0.412	0.889	0.908	2.224	2.069
IMAS-380:D08WFACXX:4:250019045	3.136	3.177	3.38	3.546	73.925	74.073	3.029	3.138	169.268	169.785	79.012	79.949	0.464	0.469	0.89	0.91	2.234	2.114
IMAS-381:D08WFACXX:4:250019046	2.954	2.816	3.173	3.148	73.604	73.821	2.878	3.017	173.231	174.855	81.877	84.078	0.468	0.479	0.874	0.846	2.244	2.094
IMAS-382:D08WFACXX:4:250019047	2.258	1.221	2.556	1.586	75.952	76.452	3.318	3.647	151.774	148.996	68.133	67.515	0.443	0.448	0.874	0.841	2.348	2.816
IMAS-383:D08WFACXX:4:250019048	2.99	2.894	3.179	3.137	76.011	76.397	4.465	5.219	185.725	189.084	86.541	89.081	0.462	0.47	0.87	0.834	2.301	2.391
IMAS-387:D08WFACXX:5:250019083	2.661	2.374	2.893	2.623	71.531	71.522	4.426	4.922	172.79	173.65	73.399	73.598	0.418	0.417	0.874	0.858	2.327	2.508
IMAS-388:D08WFACXX:5:250019119	2.971	2.901	3.174	3.155	71.276	71.254	3.657	3.94	179.094	180.714	78.615	79.469	0.434	0.435	0.867	0.833	2.334	2.568
IMAS-389:D08WFACXX:5:250019120	2.841	1.798	3.07	2.443	70.602	70.146	2.103	1.304	164.263	163.532	73.536	75.03	0.441	0.454	0.886	0.956	2.317	2.907
IMAS-39:D08WFACXX:1:250018603	3.09	3.114	3.204	3.228	70.975	70.944	2.502	2.479	163.519	163.293	75.038	75.47	0.458	0.463	0.878	0.87	2.23	2.07
IMAS-390:D08WFACXX:5:250019084	2.974	2.918	3.148	3.122	73.425	73.541	2.851	2.925	175.822	177.119	75.786	76.296	0.428	0.428	0.892	0.918	2.319	2.483
IMAS-391:D08WFACXX:5:250019121	2.846	2.64	2.963	2.706	73.42	73.588	1.904	1.657	160.801	160.125	76.02	76.884	0.46	0.467	0.885	0.896	2.259	2.209
IMAS-392:D08WFACXX:5:250019085	3.135	3.206	3.171	3.169	72.107	72.147	2.586	2.582	168.533	168.935	75.052	75.607	0.439	0.441	0.88	0.878	2.257	2.182
IMAS-393:D08WFACXX:5:250019122	3.121	3.167	3.286	3.404	72.617	72.73	2.731	2.792	171.729	172.924	78.135	79.455	0.453	0.459	0.879	0.872	2.214	1.987
IMAS-394:D08WFACXX:5:250019086	3.046	2.994	3.172	3.133	71.444	71.43	2.599	2.605	164.918	164.893	75.066	76.032	0.448	0.455	0.865	0.783	2.293	2.409
IMAS-395:D08WFACXX:5:250019087	3.062	3.039	3.16	3.11	68.573	68.39	3.494	3.73	163.591	163.401	65.364	64.596	0.396	0.391	0.88	0.878	2.348	2.624
IMAS-396:D08WFACXX:5:250019088	3.314	3.492	3.446	3.695	71.326	71.306	2.931	3.042	162.493	161.998	72.797	72.973	0.44	0.443	0.896	0.936	2.258	2.202
IMAS-397:D08WFACXX:5:250019089	3.019	2.946	3.212	3.231	75.216	75.559	2.967	3.15	179.933	182.628	80.539	82.274	0.445	0.449	0.86	0.785	2.308	2.452
IMAS-398:D08WFACXX:5:250019090	3.017	2.983	3.155	3.118	70.351	70.264	3.649	3.966	176.926	178.352	76.725	77.357	0.433	0.434	0.885	0.893	2.321	2.538
IMAS-399:D08WFACXX:5:250019091	2.894	2.333	2.998	2.345	71.386	71.36	2.72	2.851	176.658	182.33	76.786	79.486	0.432	0.435	0.878	0.84	2.254	2.1
IMAS-4:D08WFACXX:1:250018611	3.028	2.998	3.097	3.015	71.08	71.05	2.712	2.744	156.171	155.03	67.121	66.508	0.426	0.426	0.894	0.923	2.256	2.191
IMAS-40:D08WFACXX:1:250018619	2.944	2.855	3.168	3.15	70.688	70.634	2.437	2.391	160.681	160.064	67.815	67.275	0.418	0.417	0.879	0.873	2.392	2.812
IMAS-400:D08WFACXX:5:250019092	2.849	1.921	3.003	2.146	70.549	70.122	2.54	2.471	169.199	171.712	76.975	80.83	0.444	0.459	0.883	0.911	2.277	2.399
IMAS-401:D08WFACXX:5:250019123	3.131	3.188	3.139	3.073	71.876	71.9	2.902	3.019	165.642	165.517	73.993	74.344	0.443	0.446	0.884	0.893	2.262	2.224
IMAS-402:D08WFACXX:5:250019124	2.625	1.886	2.847	2.232	73.723	74.057	2.49	2.44	165.07	164.995	73.416	73.905	0.442	0.447	0.879	0.862	2.297	2.428
IMAS-403:D08WFACXX:5:250019125	3.006	2.95	3.221	3.25	72.248	72.295	2.937	3.043	179.183	180.905	80.45	81.556	0.441	0.443	0.866	0.829	2.349	2.61
IMAS-404:D08WFACXX:5:250019093	3.072	3.059	3.208	3.206	69.949	69.795	1.708	1.358	163.842	163.459	67.998	67.165	0.414	0.41	0.882	0.886	2.238	2.084
IMAS-405:D08WFACXX:5:250019094	3.052	3.044	3.16	3.124	72.387	72.458	3.108	3.291	162.447	161.938	70.832	70.717	0.431	0.432	0.867	0.823	2.221	2.006
IMAS-406:D08WFACXX:5:250019095	2.626	2.097	2.834	2.301	75.047	75.441	2.867	2.995	175.028	177.093	84.483	87.317	0.473	0.485	0.882	0.882	2.257	2.171
IMAS-408:D08WFACXX:5:250019097	3.306	3.724	3.337	3.615	72.584	72.711	1.671	1.066	165.278	165.31	72.786	73.282	0.437	0.44	0.875	0.841	2.232	2.059
IMAS-409:D08WFACXX:5:250019126	2.831	2.661	2.927	2.677	71.026	70.984	3.57	3.826	167.498	167.683	77.163	77.809	0.452	0.456	0.87	0.843	2.273	2.31
IMAS-41:D08WFACXX:1:250018604	3.153	3.217	3.2	3.214	74.538	74.778	3.094	3.244	173.977	175.24	77.743	78.642	0.451	0.455	0.875	0.859	2.272	2.272
IMAS-410:D08WFACXX:5:250019098	2.859	2.714	3.022	2.87	71.624	71.636	3.238	3.398	166.741	166.968	74.11	74.42	0.441	0.442	0.881	0.88	2.289	2.348
IMAS-411:D08WFACXX:5:250019099	2.996	2.937	3.112	3.035	71.574	71.576	3.64	3.923	160.445	159.768	69.705	69.38	0.429	0.429	0.867	0.835	2.227	2.083
IMAS-412:D08WFACXX:5:250019100	3.197	3.291	3.259	3.334	71.848	71.874	2.771	2.81	154.64	153.373	67.955	67.492	0.423	0.422	0.898	0.935	2.172	1.823
IMAS-413:D08WFACXX:5:250019101	2.836	2.677	2.992	2.816	71.166	71.155	3.848	4.188	152.253	150.713	65.462	64.7	0.422	0.422	0.879	0.875	2.216	2.025
IMAS-414:D08WFACXX:5:250019102	2.928	2.688	2.992	2.543	73.101	73.333	3.065	3.372	173.213	175.545	78.289	80.502	0.451	0.46	0.882	0.887	2.275	2.343
IMAS-415:D08WFACXX:5:250019103	2.962	2.873	3.179	3.145	73.836	73.984	4.033	4.428	181.077	183.011	85.431	87.175	0.473	0.48	0.866	0.831	2.303	2.429
IMAS-416:D08WFACXX:5:250019104	3.271	3.433	3.387	3.604	73.253	73.386	3.073	3.228	161.518	160.849	69.496	69.121	0.43	0.43	0.887	0.902	2.196	1.837
IMAS-417:D08WFACXX:5:250019105	3.039	2.988	3.16	3.081	71.201	71.129	2.966	3.23	162.623	161.739	68.49	67.438	0.413	0.406	0.866	0.773	2.291	2.468
IMAS-418:D08WFACXX:5:250019106	3.197	3.277	3.247	3.294	71.948	71.979	2.414	2.363	170.403	170.957	74.907	75.3	0.435	0.437	0.882	0.885	2.207	1.995
IMAS-419:D08WFACXX:5:250019107	3.004	2.947	3.11	3.017	72.064	72.092	2.695	2.711	168.833	169.259	70.479	70.261	0.414	0.412	0.881	0.881	2.248	2.172
IMAS-42:D08WFACXX:1:250018620	3.171	3.252	3.143	3.108	67.258	66.952	2.488	2.457	150.901	148.922	63.679	62.447	0.414	0.412	0.888	0.907	2.285	2.343
IMAS-420:D08WFACXX:5:250019108	2.812	2.635	2.97	2.773	71.247	71.215	3.692	3.992	161.054	160.4	69.394	69.03	0.427	0.426	0.874	0.856	2.287	2.33
IMAS-421:D08WFACXX:5:250019109	3.324	3.511	3.394	3.59	71.243	71.217	2.492	2.467	163.228	162.834	74.324	74.589	0.452	0.456	0.886	0.897	2.323	2.479
IMAS-422:D08WFACXX:5:250019110	3.356	3.601	3.371	3.6	70.533	70.451	2.339	2.257	162.514	161.982	70.264	69.989	0.428	0.428	0.886	0.899	2.172	1.777
IMAS-423:D08WFACXX:5:250019111	3.16	3.221	3.263	3.328	74.739	74.95	3.754	4.073	173.608	174.597	76.331	76.903	0.44	0.441	0.879	0.873	2.279	2.318
IMAS-425:D08WFACXX:5:250019112	2.828	2.618	2.992	2.762	72.427	72.504	2.541	2.526	161.833	161.312	73.725	74.082	0.45	0.455	0.883	0.889	2.26	2.209
IMAS-426:D08WFACXX:5:250019128	2.832	2.552	2.919	2.509	74.352	74.645	2.839	2.952	170.171	171.013	74.992	75.678	0.435	0.436	0.882	0.886	2.326	2.591
IMAS-427:D08WFACXX:5:250019113	3.181	3.282	3.277	3.387	70.218	70.118	2.635	2.644	170.301	170.987	79.887	81.146	0.463	0.47	0.883	0.888	2.281	2.322
IMAS-428:D08WFACXX:5:250019114	3.535	3.926	3.639	4.147	73.039	73.154	1.865	1.624	174.828	176.121	79.509	80.607	0.451	0.455	0.881	0.88	2.254	2.162
IMAS-429:D08WFACXX:5:250019115	2.943	2.825	3.115	3.011	71.744	71.747	3.232	3.446	167.874	168.161	73.137	73.27	0.431	0.431	0.871	0.845	2.251	2.157
IMAS-43:D08WFACXX:1:250018605	3.195	3.289	3.305	3.422	73.271	73.395	2.882	2.974	168.669	169.004	75.966	76.636	0.447	0.45	0.883	0.889	2.26	2.214
IMAS-430:D08WFACXX:5:250019116	2.909	2.774	3.042	2.875	73.31	73.453	2.152	2.023	173.403	174.521	76.874	77.604	0.44	0.441	0.864	0.814	2.265	2.24
IMAS-44:D08WFACXX:1:250018606	2.914	2.808	3.073	2.958	74.176	74.361	2.536	2.519	165.414	165.301	65.86	64.954	0.398	0.393	0.877	0.864	2.26	2.222
IMAS-45:D08WFACXX:1:250018607	3.179	3.296	3.272	3.398	72.003	72.038	2.636	2.636	169.648	170.289	69.307	68.884	0.405	0.4	0.89	0.916	2.282	2.365
IMAS-47:D08WFACXX:1:250018609	2.924	2.833	2.883	2.632	70.392	70.321	1.802	1.596	169.592	169.977	72.367	72.424	0.421	0.42	0.886	0.897	2.342	2.583
IMAS-48:D08WFACXX:1:250018610	2.949	2.868	3.083	2.983	67.247	66.995	1.895	1.713	150.251	148.447	67.725	67.18	0.442	0.445	0.891	0.912	2.367	2.694
IMAS-49:D08WFACXX:1:250018621	3.078	3.082	3.223	3.247	74.191	74.346	2.162	2.056	174.958	176.004	77.746	78.487	0.437	0.438	0.887	0.899	2.248	2.154
IMAS-5:D08WFACXX:1:250018612	2.807	2.607	2.989	2.784	70.953	70.907	2.667	2.686	165.946	165.852	68.806	68.326	0.415	0.413	0.886	0.898	2.315	2.557
IMAS-50:D08WFACXX:1:250018622	2.937	2.852	3.131	3.082	70.431	70.357	2.552	2.546	164.579	164.443	70.46	70.314	0.423	0.422	0.891	0.913	2.271	2.296
IMAS-51:D08WFACXX:1:250018623	3.014	2.958	3.116	3.035	71.357	71.338	2.907	3	161.219	160.692	68.595	68.175	0.42	0.419	0.873	0.854	2.22	2.052
IMAS-52:D08WFACXX:1:250018624	2.847	2.706	3.028	2.902	71.549	71.541	2.942	3.036	170.289	170.679	76.542	77.083	0.444	0.446	0.877	0.868	2.253	2.186
IMAS-53:D08WFACXX:1:250018625	2.983	2.931	3.168	3.152	71.816	71.834	2.631	2.641	167.332	167.555	71.029	70.948	0.418	0.416	0.868	0.836	2.286	2.329
IMAS-54:D08WFACXX:1:250018626	3.246	3.358	3.364	3.51	69.529	69.407	2.359	2.299	165.435	165.37	67.589	67.052	0.408	0.405	0.882	0.884	2.184	1.883
IMAS-55:D08WFACXX:1:250018627	3.102	3.121	3.24	3.283	69.407	69.28	2.467	2.435	162.507	162.215	66.667	66.034	0.407	0.404	0.868	0.838	2.26	2.235
IMAS-56:D08WFACXX:1:250018628	3.111	3.257	3.168	3.052	69.451	68.622	2.766	3.047	168.124	169.952	73.757	75.395	0.436	0.443	0.882	0.888	2.27	2.258
IMAS-57:D08WFACXX:1:250018629	2.932	2.862	3.042	2.938	73.051	73.147	3.133	3.257	155.81	154.719	65.85	65.11	0.416	0.414	0.88	0.878	2.324	2.546
IMAS-58:D08WFACXX:1:250018630	3.166	3.213	3.22	3.224	74.244	74.399	2.251	2.158	161.165	160.48	70.042	69.77	0.431	0.432	0.885	0.895	2.251	2.164
IMAS-59:D08WFACXX:1:250018631	2.981	2.922	3.161	3.134	74.221	74.379	3.321	3.501	166.883	167.017	70.922	70.897	0.425	0.424	0.88	0.876	2.255	2.207
IMAS-6:D08WFACXX:1:250018576	2.9	2.804	3.012	2.879	71.701	71.706	2.33	2.252	168.771	169.188	76.349	76.995	0.445	0.448	0.873	0.853	2.298	2.401
IMAS-60:D08WFACXX:1:250018632	3.329	3.493	3.39	3.548	73.148	73.243	1.78	1.577	160.141	159.601	65.184	64.398	0.403	0.399	0.899	0.938	2.266	2.241
IMAS-61:D08WFACXX:1:250018633	2.235	1.684	2.546	2.003	73.014	73.094	3.102	3.226	162.267	161.828	66.361	65.632	0.407	0.404	0.875	0.862	2.311	2.457
IMAS-62:D08WFACXX:1:250018634	2.829	2.656	3.054	2.92	76.032	76.313	3.107	3.232	166.992	167.216	71.2	71.207	0.418	0.417	0.869	0.839	2.275	2.287
IMAS-63:D08WFACXX:1:250018635	3.162	3.232	3.381	3.544	73.44	73.535	1.99	1.839	173.738	174.506	76.828	77.382	0.435	0.436	0.878	0.871	2.301	2.42
IMAS-64:D08WFACXX:1:250018636	3.586	3.915	3.589	3.896	72.325	72.366	1.75	1.533	167.295	167.383	78.14	78.927	0.46	0.465	0.895	0.926	2.253	2.175
IMAS-65:D08WFACXX:1:250018637	3.207	3.285	3.35	3.47	73.36	73.476	2.354	2.303	163.915	163.735	74.622	75.023	0.448	0.451	0.884	0.891	2.284	2.311
IMAS-66:D08WFACXX:1:250018638	3.546	3.843	3.576	3.897	74.752	74.948	1.986	1.822	171.806	172.471	72.392	72.505	0.417	0.415	0.891	0.915	2.236	2.13
IMAS-67:D08WFACXX:1:250018639	3.049	3.03	3.141	3.09	72.508	72.564	2.782	2.836	147.423	145.183	62.827	61.696	0.421	0.42	0.875	0.86	2.214	1.999
IMAS-68:D08WFACXX:1:250018640	3.202	3.355	3.232	3.263	72.069	72.157	1.559	0.996	166.498	166.704	76.707	78.264	0.455	0.466	0.885	0.901	2.263	2.211
IMAS-69:D08WFACXX:1:250018641	2.852	1.881	2.943	1.791	66.964	65.149	2.562	2.528	175.001	182.055	77.695	82.611	0.44	0.453	0.88	0.868	2.313	2.797
IMAS-7:D08WFACXX:1:250018613	3.173	3.242	3.171	3.157	72.371	72.405	2.473	2.437	173.312	174.169	75.922	76.404	0.432	0.433	0.885	0.893	2.255	2.181
IMAS-70:D08WFACXX:1:250018642	3.148	3.188	3.241	3.276	70.716	70.662	1.551	1.288	164.938	164.92	72.407	72.537	0.433	0.434	0.89	0.91	2.214	2.014
IMAS-71:D08WFACXX:1:250018643	3.095	3.15	3.173	3.16	71.403	71.383	2.599	2.597	164.294	163.943	70.414	70.052	0.424	0.423	0.888	0.924	2.237	2.06
IMAS-72:D08WFACXX:1:250018644	3.172	3.259	3.295	3.399	73.119	73.219	3.531	3.813	173.619	174.667	75.117	75.629	0.429	0.428	0.895	0.937	2.261	2.212
IMAS-73:D08WFACXX:1:250018645	3.209	3.292	3.34	3.458	67.544	67.305	2.309	2.227	152.466	150.97	64.041	63.008	0.415	0.413	0.889	0.906	2.31	2.458
IMAS-74:D08WFACXX:1:250018646	2.911	2.804	2.999	2.841	72.735	72.8	2.896	2.969	158.115	157.257	65.091	64.243	0.404	0.4	0.872	0.85	2.269	2.267
IMAS-75:D08WFACXX:1:250018647	3.284	3.41	3.416	3.595	74.419	74.591	1.904	1.735	175.066	176.12	77.625	78.39	0.443	0.446	0.866	0.828	2.206	1.985
IMAS-76:D08WFACXX:1:250018648	3.079	3.086	3.173	3.165	71.252	71.239	2.624	2.633	172.728	173.609	71.579	71.613	0.412	0.41	0.89	0.91	2.273	2.297
IMAS-77:D08WFACXX:1:250018649	3.029	3.004	3.203	3.211	71.657	71.655	2.983	3.071	157.904	156.923	64.459	63.509	0.402	0.398	0.863	0.823	2.263	2.246
IMAS-78:D08WFACXX:1:250018650	3.064	3.047	3.137	3.071	72.188	72.214	2.527	2.498	162.789	162.204	68.696	68.132	0.418	0.416	0.88	0.873	2.247	2.154
IMAS-79:D08WFACXX:1:250018651	3.252	3.376	3.261	3.315	70.462	70.382	2.494	2.464	156.854	155.702	69.569	69.271	0.436	0.438	0.891	0.914	2.258	2.22
IMAS-8:D08WFACXX:1:250018577	3.401	3.634	3.499	3.78	72.358	72.425	2.878	2.955	173.193	174.204	78.199	79.133	0.447	0.451	0.878	0.87	2.286	2.35
IMAS-80:D08WFACXX:1:250018652	3.163	3.235	3.361	3.532	73.808	73.96	2.76	2.791	175.432	176.626	78.505	79.396	0.443	0.445	0.883	0.887	2.26	2.215
IMAS-81:D08WFACXX:1:250018653	3.305	3.464	3.374	3.533	73.179	73.258	1.832	1.63	175.24	176.176	78.599	79.371	0.444	0.446	0.874	0.857	2.328	2.534
IMAS-82:D08WFACXX:1:250018654	3.401	3.637	3.473	3.753	71.495	71.494	2.14	2.009	163.845	163.674	64.978	64.05	0.391	0.385	0.882	0.884	2.24	2.128
IMAS-83:D08WFACXX:1:250018655	3.25	3.367	3.365	3.504	72.776	72.844	2.344	2.279	162.582	162.274	70.219	70.055	0.428	0.428	0.897	0.934	2.237	2.107
IMAS-84:D08WFACXX:1:250018656	3.157	3.206	3.275	3.331	72.65	72.702	1.565	1.305	169.961	170.386	70.05	69.833	0.413	0.411	0.879	0.874	2.274	2.282
IMAS-85:D08WFACXX:1:250018657	3.152	3.194	3.263	3.32	72.988	73.074	1.902	1.734	160.887	160.357	63.749	62.769	0.394	0.388	0.887	0.901	2.238	2.122
IMAS-86:D08WFACXX:1:250018658	3.001	2.921	3.112	3.001	72.337	72.397	2.912	3.005	166.944	167.055	68.248	67.752	0.404	0.399	0.856	0.785	2.317	2.517
IMAS-87:D08WFACXX:1:250018659	3.046	3.025	3.131	3.077	68.32	68.129	2.357	2.292	147.321	145.254	70.489	70.42	0.472	0.479	0.9	0.944	2.266	2.258
IMAS-88:D08WFACXX:1:250018660	3.225	3.325	3.346	3.463	72.409	72.454	2.028	1.886	165.66	165.735	70.566	70.456	0.42	0.419	0.887	0.9	2.242	2.147
IMAS-89:D08WFACXX:1:250018661	3.28	3.454	3.403	3.611	73.144	73.276	1.965	1.76	169.701	170.382	71.103	71.083	0.416	0.414	0.894	0.932	2.261	2.204
IMAS-9:D08WFACXX:1:250018614	3.321	3.48	3.253	3.299	70.903	70.85	2.639	2.649	169.331	169.587	76.429	76.862	0.443	0.445	0.878	0.87	2.305	2.414
IMAS-90:D08WFACXX:1:250018662	3.166	3.23	3.196	3.203	72.602	72.664	2.793	2.829	174.25	175.25	75.083	75.556	0.422	0.421	0.879	0.875	2.265	2.243
IMAS-91:D08WFACXX:1:250018663	3.052	3.044	3.209	3.232	72.521	72.576	1.942	1.78	169.076	169.476	73.258	73.502	0.428	0.428	0.873	0.853	2.344	2.591
IMAS-92:D08WFACXX:1:250018664	3.047	3.025	3.203	3.207	71.678	71.672	2.468	2.435	167.746	168.014	73.788	74.001	0.436	0.437	0.875	0.859	2.371	2.719
IMAS-93:D08WFACXX:1:250018665	3.184	3.255	3.318	3.431	74.992	75.207	1.755	1.542	177.955	179.402	78.949	79.968	0.436	0.438	0.877	0.866	2.33	2.518
IMAS-94:D08WFACXX:1:250018666	3.251	3.37	3.429	3.632	72.292	72.34	3.234	3.392	172.013	172.662	73.325	73.482	0.424	0.424	0.895	0.925	2.239	2.125
IMAS-95:D08WFACXX:1:250018667	3.041	3.025	3.24	3.283	73.371	73.47	2.987	3.083	163.42	163.18	68.535	68.125	0.414	0.412	0.885	0.894	2.255	2.2
IMAS-96:D08WFACXX:1:250018668	3.313	3.478	3.46	3.687	72.951	73.017	1.984	1.819	171.976	172.668	73.218	73.411	0.424	0.423	0.887	0.903	2.258	2.226
IMAS-97:D08WFACXX:2:250018700	3.279	3.405	3.426	3.612	73.204	73.286	2.72	2.774	166.368	166.444	73.439	73.646	0.437	0.439	0.875	0.86	2.262	2.245
IMAS-98:D08WFACXX:2:250018701	3.141	3.193	3.273	3.337	74.456	74.633	2.414	2.355	189.357	192.154	86.445	88.392	0.452	0.456	0.886	0.896	2.29	2.353
IMAS-99:D08WFACXX:2:250018702	3.271	3.404	3.417	3.604	72.212	72.245	2.216	2.106	169.602	169.98	71.441	71.363	0.417	0.415	0.887	0.901	2.231	2.083

## Sheet: Optimum
Table 2: BLUEs and BLUPs estimated across locations for grain yield and other agronomic traits evaluated under optimum conditions
Genotype	BLUP_GY	BLUE_GY	BLUP_FW	BLUE_FW	BLUP_AD	BLUE_AD	BLUP_ASI	BLUE_ASI	BLUP_PH	BLUE_PH	BLUP_EH	BLUE_EH	BLUP_EPO	BLUE_EPO	BLUP_EPP	BLUE_EPP	BLUP_SEN2	BLUE_SEN2
IMAS-1:D08WFACXX:1:250018573	7.862	7.921	7.975	8.012	73.691	73.732	1.08	1.57	222.894	222.721	105.245	105.008	0.471	0.47	1.013	1.021	2.216	2.061
IMAS-10:D08WFACXX:1:250018578	8.6	8.974	8.667	8.983	73.602	73.611	0.163	0.006	231.421	232.588	113.884	114.942	0.488	0.491	0.995	0.981	2.208	2.05
IMAS-100:D08WFACXX:2:250018738	8.341	8.586	8.567	8.823	73.911	74.004	0.004	-0.27	224.14	224.019	104.745	104.42	0.471	0.47	1.009	1.012	2.315	2.219
IMAS-101:D08WFACXX:2:250018739	8.357	8.734	8.411	8.702	73.491	73.451	0.251	0.115	228.918	230.018	108.704	109.085	0.471	0.469	0.996	0.975	2.685	2.908
IMAS-102:D08WFACXX:2:250018703	7.171	6.921	7.488	7.313	74.552	74.83	0.234	0.126	225.164	225.38	105.762	105.609	0.466	0.463	0.98	0.947	3.165	3.41
IMAS-103:D08WFACXX:2:250018740	7.994	8.101	8.289	8.437	73.814	73.861	-0.064	-0.379	229.519	230.155	108.644	108.892	0.473	0.473	1.007	1.008	2.792	2.88
IMAS-104:D08WFACXX:2:250018704	7.473	7.365	7.509	7.354	73.906	73.982	0.371	0.36	222.082	221.668	107.821	107.939	0.48	0.482	0.993	0.977	2.934	3.099
IMAS-105:D08WFACXX:2:250018741	7.34	7.175	7.632	7.53	73.627	73.635	0.424	0.449	222.502	222.314	100.446	99.589	0.451	0.445	1.014	1.024	2.785	2.879
IMAS-106:D08WFACXX:2:250018705	8.062	8.2	8.301	8.46	74.18	74.343	0.712	0.94	230.29	231.218	108.125	108.37	0.469	0.468	1.021	1.041	2.793	2.888
IMAS-107:D08WFACXX:2:250018706	7.685	7.659	8.368	8.547	73.6	73.648	0.69	0.902	225.733	225.898	101.985	101.331	0.457	0.453	0.991	0.972	2.703	2.761
IMAS-108:D08WFACXX:2:250018707	7.694	7.67	7.981	8.006	74.815	75.178	0.336	0.304	226.714	226.993	108.398	108.623	0.479	0.479	1.007	1.009	2.865	2.98
IMAS-109:D08WFACXX:2:250018708	7.641	7.59	7.801	7.752	73.612	73.601	0.334	0.303	225.556	225.717	107.761	107.919	0.476	0.476	1.033	1.068	3.289	3.591
IMAS-11:D08WFACXX:1:250018579	7.733	7.745	7.814	7.777	73.387	73.334	0.402	0.424	229.46	230.666	112.412	113.745	0.494	0.501	1.006	1.006	2.446	2.391
IMAS-110:D08WFACXX:2:250018709	8.106	8.254	8.303	8.459	74.411	74.674	0.519	0.617	225.381	225.727	109.271	109.723	0.484	0.486	1.026	1.051	2.443	2.382
IMAS-111:D08WFACXX:2:250018710	7.693	7.677	7.896	7.896	73.811	73.882	0.552	0.668	222.207	222.003	101.881	101.178	0.464	0.461	1.004	1.001	2.801	2.905
IMAS-112:D08WFACXX:2:250018711	7.119	6.856	7.17	6.881	74.579	74.874	-0.003	-0.273	223.587	223.375	104.895	104.566	0.476	0.476	1.042	1.088	2.864	2.99
IMAS-113:D08WFACXX:2:250018742	7.646	7.594	7.769	7.704	74.901	75.281	-0.041	-0.34	237.81	239.697	110.841	111.289	0.465	0.463	1.009	1.014	2.475	2.437
IMAS-114:D08WFACXX:2:250018743	7.837	7.889	8.001	8.047	74.907	75.315	0.215	0.093	222.336	222.162	110.555	111.1	0.497	0.502	1.027	1.053	2.517	2.495
IMAS-115:D08WFACXX:2:250018744	7.588	7.52	7.683	7.596	74.3	74.527	0.306	0.26	221.363	220.976	104.868	104.624	0.472	0.472	0.996	0.981	2.828	2.941
IMAS-116:D08WFACXX:2:250018712	7.689	7.665	7.978	8	74.963	75.355	0.468	0.522	227.778	228.312	105.107	104.943	0.461	0.458	0.988	0.966	2.823	2.934
IMAS-117:D08WFACXX:2:250018713	7.936	8.205	7.999	8.132	73.612	73.649	0.275	0.047	235.429	240.24	117.053	120.836	0.493	0.505	1.015	1.044	2.663	2.72
IMAS-118:D08WFACXX:2:250018714	7.225	7.017	7.461	7.294	74.708	75.025	0.44	0.476	228.749	229.374	110.286	110.768	0.484	0.486	1.002	0.997	3.042	3.243
IMAS-119:D08WFACXX:2:250018715	8.23	8.426	8.162	8.254	73.944	74.038	0.207	0.08	230.571	231.566	108.326	108.572	0.47	0.469	1.032	1.064	2.264	2.144
IMAS-12:D08WFACXX:1:250018580	8.292	8.521	8.314	8.478	73.486	73.473	0.103	-0.09	239.512	241.652	120.682	122.633	0.501	0.507	0.978	0.942	2.443	2.4
IMAS-121:D08WFACXX:2:250018745	7.178	6.821	7.259	6.873	73.665	73.751	0.408	0.436	228.304	229.18	109.597	110.192	0.479	0.481	1.023	1.053	2.294	1.838
IMAS-122:D08WFACXX:2:250018717	8.184	8.434	8.285	8.483	73.89	74.029	0.558	0.726	221.972	221.315	103.757	102.912	0.467	0.463	1.036	1.096	2.455	2.283
IMAS-123:D08WFACXX:2:250018718	7.996	8.151	8.242	8.439	74.951	75.562	0.834	1.294	225.434	225.548	111.553	112.368	0.491	0.495	1.021	1.049	2.459	2.305
IMAS-124:D08WFACXX:2:250018719	8.442	8.853	8.599	8.982	74.749	75.257	0.239	0.079	234.509	236.59	112.27	113.339	0.481	0.483	1.003	0.997	2.656	2.849
IMAS-126:D08WFACXX:2:250018721	8.507	8.973	8.892	9.459	73.614	73.659	0.111	-0.179	234.297	236.382	109.649	110.047	0.464	0.459	0.996	0.974	2.487	2.371
IMAS-127:D08WFACXX:2:250018722	6.253	5.65	6.432	5.866	72.597	72.334	0.24	0.141	220.358	219.974	110.073	110.635	0.501	0.507	0.983	0.954	3.672	4.16
IMAS-128:D08WFACXX:2:250018723	8.164	8.324	8.24	8.353	73.337	73.266	0.379	0.374	232.216	233.43	109.156	109.507	0.473	0.472	1.01	1.015	2.913	3.054
IMAS-129:D08WFACXX:2:250018724	8.168	8.427	8.248	8.439	73.841	73.943	0.452	0.529	218.135	216.688	103.982	103.325	0.475	0.475	1.011	1.022	2.574	2.581
IMAS-13:D08WFACXX:1:250018581	7.371	7.162	7.529	7.333	74.577	74.962	0.479	0.567	224.955	224.901	105.148	104.775	0.469	0.466	0.983	0.945	2.369	2.293
IMAS-130:D08WFACXX:2:250018725	6.58	5.83	6.563	5.75	73.366	73.261	0.083	-0.233	220.164	219.435	101.162	100.217	0.459	0.455	1.012	1.023	2.267	2.097
IMAS-131:D08WFACXX:2:250018726	7.436	7.308	7.777	7.721	73.72	73.754	0.386	0.379	215.083	213.742	100.44	99.531	0.47	0.468	0.995	0.981	2.604	2.619
IMAS-132:D08WFACXX:2:250018727	6.506	5.991	6.746	6.29	71.437	70.828	0.164	0.009	204.835	202.102	90.977	88.902	0.45	0.444	0.993	0.976	2.95	3.107
IMAS-133:D08WFACXX:2:250018728	7.388	7.247	7.353	7.147	73.041	72.926	0.552	0.66	212.971	211.497	100.396	99.68	0.467	0.466	0.988	0.966	2.785	2.88
IMAS-134:D08WFACXX:2:250018729	7.087	6.821	7.19	6.914	71.877	71.367	-0.005	-0.289	220.665	220.184	100.481	99.648	0.456	0.451	0.981	0.948	2.8	2.889
IMAS-135:D08WFACXX:2:250018730	7.313	7.14	7.583	7.462	73.28	73.215	0.101	-0.097	220.169	219.608	95.337	93.875	0.434	0.425	1.034	1.068	2.827	2.923
IMAS-136:D08WFACXX:2:250018746	7.461	7.345	7.658	7.557	71.996	71.538	0.379	0.366	217.562	216.744	92.563	90.615	0.429	0.418	1.003	1	2.989	3.173
IMAS-137:D08WFACXX:2:250018731	7.883	7.942	7.98	8.01	73.178	73.055	0.25	0.158	221.681	221.265	104.039	103.643	0.471	0.47	1.005	1.004	2.336	2.244
IMAS-138:D08WFACXX:2:250018747	6.289	5.687	6.483	5.931	73.087	72.963	0.385	0.388	213.435	212.008	101.101	100.392	0.473	0.473	0.983	0.953	2.874	2.988
IMAS-139:D08WFACXX:2:250018732	7.993	8.164	7.993	8.056	72.898	72.605	0.417	0.447	221.232	220.512	104.399	103.782	0.468	0.466	0.998	0.982	2.333	2.201
IMAS-14:D08WFACXX:1:250018582	7.882	7.938	7.7	7.617	73.141	73.037	0.89	1.244	221.063	220.635	103.452	103.085	0.471	0.47	0.994	0.979	2.08	1.878
IMAS-140:D08WFACXX:2:250018733	6.309	5.719	6.298	5.671	71.303	70.654	0.298	0.244	201.641	198.482	87.695	85.173	0.433	0.424	0.978	0.941	2.916	3.059
IMAS-141:D08WFACXX:2:250018734	7.85	7.881	8.425	8.613	72.447	72.108	0.421	0.432	224.641	224.524	106.358	106.174	0.473	0.472	1.015	1.026	2.772	2.859
IMAS-142:D08WFACXX:2:250018735	7.393	7.252	7.398	7.205	71.86	71.395	0.008	-0.251	219.526	218.839	103.018	102.547	0.47	0.469	0.998	0.988	2.601	2.631
IMAS-143:D08WFACXX:2:250018736	7.391	7.251	7.633	7.53	73.036	72.877	0.427	0.454	209.851	207.876	95.168	93.658	0.45	0.444	0.998	0.989	2.146	1.978
IMAS-144:D08WFACXX:2:250018737	7.217	6.991	7.204	6.917	72.059	71.603	0.212	0.088	222.586	222.276	99.243	98.19	0.449	0.443	1	0.993	2.863	2.993
IMAS-145:D08WFACXX:2:250018748	7.642	7.589	7.882	7.864	72.366	71.992	0.134	-0.053	220.595	219.999	103.69	103.288	0.47	0.469	1.03	1.061	2.764	2.847
IMAS-146:D08WFACXX:2:250018749	8.254	8.487	8.323	8.503	72.851	72.637	0.711	0.935	218.822	218.178	100.415	99.554	0.462	0.459	1.006	1.005	2.95	3.107
IMAS-147:D08WFACXX:2:250018750	7.396	7.26	7.471	7.306	73.819	73.918	0.71	0.931	222.273	222.031	105.377	105.27	0.473	0.472	0.996	0.982	2.984	3.166
IMAS-148:D08WFACXX:2:250018751	6.709	6.28	6.791	6.352	74.438	74.701	0.65	0.826	234.272	235.691	109.941	110.454	0.469	0.468	0.999	0.99	2.935	3.088
IMAS-149:D08WFACXX:2:250018752	6.868	6.508	7.104	6.795	71.175	70.479	0.843	1.161	201.678	198.549	95.981	94.511	0.475	0.475	0.964	0.911	3.33	3.648
IMAS-15:D08WFACXX:1:250018583	6.874	6.473	7.012	6.62	74.036	74.187	0.921	1.338	226.401	226.794	108.744	109.077	0.476	0.476	1.016	1.031	2.864	3.034
IMAS-150:D08WFACXX:2:250018753	7.189	6.959	7.353	7.134	71.368	70.731	0.073	-0.151	224.684	224.675	100.42	99.536	0.448	0.442	0.973	0.931	2.405	2.343
IMAS-151:D08WFACXX:2:250018754	8.462	8.762	8.433	8.641	71.978	71.494	0.591	0.735	218.892	218.076	102.23	101.547	0.467	0.464	1.007	1.009	2.142	1.966
IMAS-152:D08WFACXX:2:250018755	8.405	8.683	8.321	8.486	73.903	73.987	0.316	0.264	221.377	220.958	105.981	105.872	0.479	0.48	1.035	1.072	2.456	2.413
IMAS-153:D08WFACXX:2:250018756	7.713	7.698	7.773	7.716	74.016	74.162	0.268	0.19	215.873	214.724	102.606	102.059	0.474	0.473	1.008	1.009	2.382	2.302
IMAS-154:D08WFACXX:2:250018757	7.841	7.877	7.876	7.854	73.758	73.816	0.351	0.32	230.141	231.119	111.008	111.735	0.483	0.485	1.02	1.039	2.787	2.879
IMAS-155:D08WFACXX:2:250018758	7.095	6.814	7.176	6.88	73.72	73.753	0.134	-0.045	207.862	205.593	105.918	105.807	0.506	0.512	1.039	1.081	2.82	2.942
IMAS-156:D08WFACXX:2:250018759	7.21	6.997	7.477	7.316	72.546	72.25	0.418	0.438	214.557	213.159	101.606	100.893	0.473	0.473	1.09	1.194	2.095	1.908
IMAS-157:D08WFACXX:2:250018760	7.628	7.583	7.72	7.65	72.236	71.855	0.158	0.003	218.799	218.048	102.336	101.635	0.468	0.466	0.993	0.976	2.529	2.528
IMAS-158:D08WFACXX:2:250018761	7.022	6.713	7.215	6.932	72.892	72.688	0.356	0.331	204.39	201.471	93.285	91.437	0.461	0.458	1.038	1.078	2.715	2.771
IMAS-159:D08WFACXX:2:250018762	6.134	5.25	6.436	5.672	71.929	71.326	-0.022	-0.388	207.37	204.155	94.19	92.186	0.455	0.45	1.029	1.063	2.97	3.13
IMAS-16:D08WFACXX:1:250018584	8.458	8.759	8.728	9.053	74.587	74.901	0.364	0.351	237.559	239.414	117.584	119.048	0.492	0.496	1.014	1.023	2.509	2.493
IMAS-160:D08WFACXX:2:250018763	8.434	8.719	8.408	8.601	72.662	72.382	0.332	0.294	234.386	235.639	111.397	112.002	0.474	0.474	1.011	1.018	2.699	2.756
IMAS-161:D08WFACXX:2:250018764	8.137	8.884	8.291	8.981	73.706	73.938	0.185	-0.454	229.01	232.369	103.128	101.286	0.455	0.436	1.01	1.03	2.468	2.331
IMAS-162:D08WFACXX:2:250018765	7.917	7.99	7.815	7.782	72.712	72.476	-0.195	-0.594	224.062	224.099	104.674	104.466	0.47	0.47	1.015	1.026	3.085	3.319
IMAS-163:D08WFACXX:2:250018766	7.412	7.291	7.37	7.176	74.121	74.3	0.281	0.204	209.78	207.884	95.294	93.887	0.452	0.447	1.03	1.06	2.804	2.905
IMAS-164:D08WFACXX:2:250018767	7.525	7.435	7.733	7.663	74.215	74.397	0.218	0.102	226.521	226.877	112.388	113.077	0.494	0.498	1.1	1.217	2.084	1.88
IMAS-165:D08WFACXX:2:250018768	7.244	7.047	7.417	7.24	72.986	72.841	-0.381	-0.912	211.917	210.301	101.606	100.991	0.477	0.478	0.986	0.96	2.946	3.111
IMAS-166:D08WFACXX:2:250018769	7.205	6.976	7.306	7.064	71.195	70.447	0.385	0.381	211.795	209.981	100.615	99.746	0.475	0.475	1.029	1.06	2.691	2.742
IMAS-167:D08WFACXX:2:250018770	7.995	8.106	8.085	8.165	72.754	72.531	0.426	0.452	226.66	227.238	112.913	113.808	0.495	0.499	1.031	1.063	2.971	3.131
IMAS-168:D08WFACXX:2:250018771	7.692	7.669	7.934	7.943	72.388	72.039	-0.297	-0.775	221.012	220.476	102.666	102.079	0.466	0.464	1.089	1.192	2.539	2.525
IMAS-169:D08WFACXX:2:250018772	7.666	7.621	8.004	8.052	72.719	72.426	0.345	0.316	226.654	227.095	100.8	99.666	0.45	0.442	1.069	1.175	2.446	2.393
IMAS-17:D08WFACXX:1:250018615	8.47	8.751	8.66	8.931	73.403	73.361	0.436	0.472	219.556	218.989	109.019	109.324	0.501	0.506	0.986	0.96	2.661	2.707
IMAS-170:D08WFACXX:2:250018773	7.071	6.803	7.324	7.105	71.312	70.664	0.444	0.485	200.396	197.024	92.962	91.085	0.46	0.457	0.995	0.981	2.627	2.643
IMAS-171:D08WFACXX:2:250018774	7.912	7.98	7.919	7.914	71.736	71.19	0.181	0.036	214.847	213.25	98.16	96.843	0.457	0.453	1.024	1.046	2.64	2.669
IMAS-172:D08WFACXX:2:250018775	7.283	7.088	7.225	6.957	71.393	70.746	0.02	-0.236	202.79	199.616	91.163	89.039	0.454	0.449	1.012	1.02	2.536	2.532
IMAS-173:D08WFACXX:2:250018776	7.302	7.125	7.454	7.275	71.989	71.53	0.156	-0.006	205.359	202.683	98.909	97.928	0.482	0.484	1.048	1.1	2.439	2.385
IMAS-174:D08WFACXX:2:250018777	7.262	7.063	7.512	7.356	71.654	71.091	-0.155	-0.524	218.5	217.799	99.616	98.788	0.455	0.451	1.046	1.097	3.152	3.396
IMAS-175:D08WFACXX:2:250018778	8.111	8.274	8.322	8.49	72.268	71.9	-0.32	-0.814	211.329	209.435	104.776	104.488	0.499	0.505	1.027	1.053	2.615	2.635
IMAS-176:D08WFACXX:2:250018779	7.196	6.962	7.275	7.019	72.022	71.567	-0.336	-0.837	204.724	201.849	94.569	92.801	0.46	0.457	1.009	1.013	2.878	3
IMAS-177:D08WFACXX:2:250018780	7.138	6.89	7.329	7.109	73.407	73.393	0.073	-0.148	217.279	216.42	99.125	98.21	0.456	0.452	1.005	1.004	2.563	2.563
IMAS-178:D08WFACXX:2:250018781	7.674	7.648	7.917	7.923	72.188	71.798	0.397	0.404	222.149	221.817	101.396	100.639	0.458	0.454	1.013	1.022	2.907	3.059
IMAS-179:D08WFACXX:2:250018782	7.424	7.298	7.59	7.474	71.342	70.684	0.081	-0.126	208.997	206.938	95.609	94.208	0.445	0.439	1.015	1.025	2.609	2.627
IMAS-18:D08WFACXX:1:250018616	7.642	7.606	7.824	7.793	73.61	73.615	0.291	0.22	231.193	232.212	110.178	110.582	0.477	0.477	1.014	1.023	2.359	2.272
IMAS-180:D08WFACXX:2:250018783	7.754	7.755	8.204	8.318	71.046	70.289	0.257	0.168	212.705	211.106	99.62	98.621	0.466	0.463	1.05	1.106	3.217	3.499
IMAS-181:D08WFACXX:2:250018784	8.038	8.164	8.106	8.187	72.014	71.564	0.355	0.332	214.429	213.035	97.283	96.057	0.454	0.45	1.03	1.06	2.416	2.359
IMAS-182:D08WFACXX:2:250018785	7.364	7.217	7.497	7.345	71.72	71.203	0.36	0.345	219.385	218.882	103.726	103.378	0.474	0.474	1.041	1.085	2.518	2.498
IMAS-183:D08WFACXX:2:250018786	8.21	8.395	8.051	8.099	73.488	73.478	-0.408	-0.953	215.01	213.744	104.501	104.235	0.48	0.482	1.007	1.008	2.62	2.64
IMAS-184:D08WFACXX:2:250018787	8.037	8.146	7.875	7.855	73.39	73.332	0.081	-0.119	218.248	217.408	106.152	106.113	0.486	0.489	1.016	1.028	2.706	2.751
IMAS-185:D08WFACXX:2:250018788	8.497	8.817	8.434	8.645	74.723	75.059	-0.167	-0.559	227.679	228.093	107.551	107.654	0.472	0.472	1.035	1.07	3.04	3.238
IMAS-186:D08WFACXX:2:250018789	8.591	8.938	8.653	8.933	73.461	73.4	0.128	-0.065	228.209	228.617	115.976	117.082	0.507	0.514	1.022	1.042	2.83	2.958
IMAS-187:D08WFACXX:2:250018790	7.369	7.219	7.515	7.366	74.579	74.89	0.014	-0.241	225.652	225.869	99.656	98.653	0.443	0.435	1.045	1.092	2.573	2.58
IMAS-188:D08WFACXX:2:250018791	7.725	7.712	7.74	7.666	73.992	74.112	0.258	0.177	227.578	228.027	110.318	110.756	0.482	0.484	1.029	1.058	2.489	2.465
IMAS-189:D08WFACXX:2:250018792	8.508	8.828	8.545	8.795	72.323	71.95	-0.141	-0.51	218.897	218.085	101.093	100.301	0.464	0.462	1.026	1.05	2.646	2.678
IMAS-19:D08WFACXX:1:250018617	8.125	8.388	8.057	8.164	72.045	71.404	0.154	-0.069	216.16	214.655	102.075	101.398	0.467	0.466	1.052	1.144	2.358	2.232
IMAS-190:D08WFACXX:2:250018793	8.285	8.512	8.457	8.677	74.114	74.298	0.118	-0.064	220.128	219.431	109.03	109.259	0.491	0.495	1.036	1.073	2.986	3.154
IMAS-191:D08WFACXX:2:250018794	7.917	7.982	8.184	8.287	73.524	73.51	-0.062	-0.38	225.923	226.078	113.007	113.804	0.499	0.505	1.029	1.056	2.529	2.513
IMAS-192:D08WFACXX:2:250018795	7.899	7.966	8.26	8.399	73.786	73.83	-0.189	-0.587	228.419	229.007	105.753	105.588	0.471	0.471	1.024	1.047	3.371	3.714
IMAS-193:D08WFACXX:3:250018827	7.835	7.874	8.034	8.083	74.263	74.446	-0.312	-0.804	217.759	216.821	103.122	102.616	0.475	0.475	0.999	0.99	2.614	2.635
IMAS-194:D08WFACXX:3:250018828	8.116	8.262	8.036	8.077	73.056	72.904	-0.072	-0.388	228.626	229.259	105.258	105.095	0.46	0.456	1.064	1.137	3.129	3.38
IMAS-195:D08WFACXX:3:250018829	8.004	8.115	8.185	8.294	73.73	73.804	0.435	0.471	219.713	219.074	100.655	99.794	0.457	0.453	0.994	0.979	2.465	2.411
IMAS-196:D08WFACXX:3:250018865	8.733	9.149	8.867	9.244	73.195	73.107	0.435	0.471	227.561	228.138	103.306	102.928	0.458	0.455	1.015	1.026	2.663	2.708
IMAS-197:D08WFACXX:3:250018866	7.616	7.575	7.79	7.76	74.238	74.436	0.253	0.159	223.169	223.092	106.311	106.221	0.478	0.479	1.026	1.051	2.848	2.952
IMAS-198:D08WFACXX:3:250018830	7.039	6.748	7.256	6.996	72.285	71.886	-0.057	-0.36	216.355	215.237	101.411	100.661	0.472	0.471	1.011	1.017	2.922	3.077
IMAS-199:D08WFACXX:3:250018867	7.691	7.666	8.07	8.133	73.828	73.902	-0.095	-0.431	227.324	227.791	110.304	110.848	0.488	0.491	1.002	0.997	2.694	2.756
IMAS-2:D08WFACXX:1:250018574	8.692	9.082	8.78	9.114	75.305	75.825	0.478	0.544	231.384	232.417	115.807	116.994	0.499	0.504	1.005	1.004	2.603	2.626
IMAS-20:D08WFACXX:1:250018585	8.304	8.544	8.303	8.467	72.671	72.4	0.078	-0.136	229.088	229.794	117.131	118.573	0.511	0.52	1.002	0.997	2.976	3.14
IMAS-200:D08WFACXX:3:250018831	7.53	7.433	7.502	7.334	72.927	72.751	0.936	1.317	221.875	221.511	99.902	98.912	0.453	0.447	1.004	1	2.6	2.621
IMAS-201:D08WFACXX:3:250018868	6.734	6.104	6.67	5.937	74.012	74.223	0.556	0.747	208.112	204.739	102.12	101.233	0.485	0.489	0.964	0.88	2.709	2.769
IMAS-202:D08WFACXX:3:250018832	7.203	6.957	7.493	7.313	72.371	71.998	1.019	1.461	219.95	219.229	101.502	100.646	0.464	0.461	0.979	0.944	2.541	2.537
IMAS-203:D08WFACXX:3:250018833	7.389	7.24	7.497	7.329	72.584	72.312	-0.037	-0.33	225.159	225.37	107.024	107.19	0.475	0.476	1.016	1.028	3.39	3.753
IMAS-204:D08WFACXX:3:250018834	6.57	6.078	6.718	6.243	71.139	70.43	-0.008	-0.293	222.335	222.031	95.882	94.353	0.441	0.433	0.987	0.963	3.286	3.586
IMAS-205:D08WFACXX:3:250018835	6.934	6.608	7.093	6.784	71.444	70.847	0.207	0.083	225.652	226.033	103.179	102.822	0.46	0.457	1.048	1.101	3.578	4.001
IMAS-206:D08WFACXX:3:250018836	6.879	6.521	6.861	6.459	71.71	71.174	-0.19	-0.596	218.276	217.448	99.555	98.552	0.455	0.45	0.989	0.968	3.608	4.047
IMAS-207:D08WFACXX:3:250018837	6.954	6.634	7.119	6.819	72.419	72.098	0.035	-0.219	219.204	218.578	97.145	95.881	0.445	0.438	0.98	0.948	2.948	3.104
IMAS-208:D08WFACXX:3:250018838	8.21	8.417	8.367	8.555	73.778	73.829	0.524	0.63	226.422	226.655	109.891	110.269	0.482	0.484	0.986	0.96	2.812	2.91
IMAS-209:D08WFACXX:3:250018869	8.102	8.263	8.543	8.805	74.457	74.741	0.147	-0.011	238.735	240.964	112.144	112.95	0.469	0.468	1.003	1	2.486	2.46
IMAS-21:D08WFACXX:1:250018586	7.659	7.625	7.909	7.913	72.017	71.563	0.317	0.268	214.593	213.25	103.019	102.529	0.48	0.482	1.007	1.007	2.104	1.898
IMAS-210:D08WFACXX:3:250018870	7.919	8.023	8.087	8.19	74.293	74.583	0.736	1.053	242.636	246.165	117.319	119.389	0.479	0.48	1.014	1.029	2.528	2.505
IMAS-211:D08WFACXX:3:250018871	7.522	7.426	7.948	7.957	73.737	73.759	-0.114	-0.469	224.187	224.121	105.02	104.715	0.469	0.467	0.982	0.952	2.63	2.664
IMAS-212:D08WFACXX:3:250018839	7.999	8.106	8.17	8.277	74.71	75.057	0.732	0.977	217.915	217.211	101.342	100.621	0.463	0.46	0.993	0.977	2.729	2.805
IMAS-213:D08WFACXX:3:250018840	8.204	8.493	8.404	8.693	74.86	75.421	1.026	1.695	234.589	236.91	110.998	112.032	0.474	0.474	0.98	0.926	2.658	2.807
IMAS-214:D08WFACXX:3:250018841	8.033	8.159	8.365	8.551	73.442	73.408	0.841	1.165	217.853	217.015	102.803	102.312	0.473	0.473	1.005	1.002	2.47	2.416
IMAS-215:D08WFACXX:3:250018842	8.216	8.412	8.283	8.432	73.309	73.225	0.099	-0.098	218.821	217.932	103.349	102.851	0.475	0.474	1.022	1.041	2.289	2.169
IMAS-216:D08WFACXX:3:250018843	8.191	8.364	8.269	8.4	74.394	74.632	0.359	0.333	229.48	230.174	113.053	113.846	0.492	0.495	1.002	0.996	2.864	2.986
IMAS-217:D08WFACXX:3:250018872	7.785	7.798	7.94	7.949	74.946	75.348	-0.304	-0.781	230.013	230.825	115.935	117.123	0.501	0.507	0.994	0.978	3.282	3.581
IMAS-218:D08WFACXX:3:250018844	7.726	7.701	7.958	7.967	74.406	74.73	0.32	0.276	225.593	225.697	111.831	112.721	0.493	0.499	1.046	1.112	3.338	3.653
IMAS-219:D08WFACXX:3:250018845	7.548	7.459	7.666	7.567	73.994	74.111	0.449	0.489	232.773	234.041	107.795	107.883	0.463	0.46	0.971	0.927	2.801	2.907
IMAS-22:D08WFACXX:1:250018587	7.31	6.489	7.601	7.044	73.92	74.385	0.551	1.062	232.469	237.719	110.012	113.427	0.469	0.458	1.01	1.043	NA	NA
IMAS-220:D08WFACXX:3:250018846	7.728	7.709	8.191	8.323	73.602	73.597	0.208	0.051	222.455	222.085	104.342	103.831	0.469	0.467	1.049	1.119	2.467	2.416
IMAS-221:D08WFACXX:3:250018847	7.003	6.704	7.132	6.832	75.046	75.478	0.551	0.673	228.629	229.256	115.173	116.314	0.503	0.509	0.993	0.978	2.814	2.911
IMAS-222:D08WFACXX:3:250018848	7.83	7.873	8.103	8.183	74.147	74.305	0.34	0.301	227.996	228.627	108.963	109.256	0.476	0.476	1.002	0.998	2.802	2.898
IMAS-224:D08WFACXX:3:250018850	7.035	6.739	7.267	7.014	73.903	74.002	1.159	1.695	229.388	230.141	104.886	104.692	0.458	0.454	0.996	0.982	3	3.173
IMAS-225:D08WFACXX:3:250018851	7.294	7.086	7.714	7.618	74.101	74.254	0.258	0.17	228.832	229.293	103.659	103.081	0.455	0.45	1.011	1.016	2.763	2.841
IMAS-226:D08WFACXX:3:250018852	7.647	7.613	7.876	7.87	74.196	74.39	0.203	0.076	218.654	217.966	99.095	98.102	0.452	0.447	1.002	0.997	2.874	3.005
IMAS-227:D08WFACXX:3:250018853	8.205	8.412	8.501	8.753	74.175	74.38	0.404	0.427	232.72	234.18	106.483	106.539	0.459	0.455	1.009	1.014	2.969	3.133
IMAS-228:D08WFACXX:3:250018854	7.368	7.205	7.626	7.516	73.795	73.882	0.37	0.357	213.125	211.516	95.404	93.673	0.444	0.436	0.991	0.969	2.533	2.528
IMAS-229:D08WFACXX:3:250018855	8.219	8.415	8.358	8.533	74.238	74.416	0.378	0.37	228.452	228.934	101.485	100.694	0.445	0.438	1.012	1.019	2.493	2.478
IMAS-23:D08WFACXX:1:250018588	7.141	6.766	7.193	6.771	71.594	70.705	0.483	0.573	206.774	203.015	93.41	91.109	0.453	0.447	0.992	0.97	2.04	1.742
IMAS-230:D08WFACXX:3:250018856	8.393	8.668	8.406	8.606	73.259	73.166	-0.056	-0.362	227.321	227.933	108.078	108.369	0.474	0.474	1.012	1.018	2.55	2.549
IMAS-231:D08WFACXX:3:250018857	7.878	7.948	8.046	8.115	74.83	75.177	0.344	0.316	223.892	223.83	105.314	105.154	0.473	0.472	1.007	1.007	2.534	2.518
IMAS-232:D08WFACXX:3:250018873	8.144	8.312	8.265	8.404	74.345	74.606	0.59	0.737	214.496	213.303	102.086	101.539	0.476	0.477	0.994	0.978	2.665	2.707
IMAS-233:D08WFACXX:3:250018858	8.377	8.641	8.678	8.98	76.01	76.707	0.089	-0.122	236.248	237.975	117.392	118.888	0.492	0.496	0.996	0.983	2.37	2.287
IMAS-234:D08WFACXX:3:250018874	8.44	8.738	8.406	8.61	73.803	73.88	0.143	-0.024	228.207	228.78	117.989	119.499	0.516	0.526	1.036	1.074	2.901	3.042
IMAS-236:D08WFACXX:3:250018860	7.672	7.632	7.799	7.748	73.458	73.432	0.132	-0.038	217.241	216.196	96.835	95.461	0.44	0.431	1.013	1.022	2.66	2.693
IMAS-237:D08WFACXX:3:250018861	8.948	9.45	9.219	9.738	73.811	73.877	0.076	-0.142	220.925	220.491	102.954	102.413	0.463	0.46	1.015	1.027	2.418	2.365
IMAS-238:D08WFACXX:3:250018862	7.564	7.434	7.678	7.529	74.209	74.476	0.331	0.275	221.578	220.866	99.514	97.691	0.451	0.442	1.001	0.989	2.438	2.263
IMAS-239:D08WFACXX:3:250018863	8.16	8.332	8.689	8.992	75.518	76.072	0.675	0.87	230.783	231.69	116.28	117.505	0.498	0.503	1.013	1.02	2.752	2.833
IMAS-24:D08WFACXX:1:250018589	7.814	7.847	7.903	7.907	73.811	73.869	0.079	-0.14	221.181	220.715	107.649	107.736	0.484	0.486	0.974	0.933	2.428	2.367
IMAS-240:D08WFACXX:3:250018864	7.783	7.812	8.034	8.095	75.869	76.558	0.48	0.551	225.429	225.67	113.705	114.722	0.498	0.503	1.026	1.053	2.971	3.159
IMAS-241:D08WFACXX:3:250018875	7.526	7.387	7.719	7.61	74.363	74.702	-0.148	-0.707	224.98	225.148	105.55	105.293	0.47	0.468	1.011	1.021	2.982	3.15
IMAS-242:D08WFACXX:3:250018876	7.109	6.848	7.547	7.404	72.628	72.358	-0.058	-0.373	221.172	220.801	102.936	102.436	0.465	0.463	1.011	1.017	2.774	2.86
IMAS-243:D08WFACXX:3:250018877	8.035	8.159	8.117	8.199	74.177	74.323	0.126	-0.054	225.748	225.865	103.97	103.595	0.461	0.458	0.985	0.957	3.065	3.266
IMAS-244:D08WFACXX:3:250018878	7.717	7.697	7.841	7.809	73.441	73.429	0.878	1.22	229.609	230.367	108.081	108.215	0.465	0.462	1.007	1.008	1.997	1.766
IMAS-245:D08WFACXX:3:250018879	8.36	8.632	8.453	8.678	73.532	73.532	0.702	0.937	222.802	222.586	101.846	101.124	0.458	0.454	1.001	0.993	2.309	2.207
IMAS-246:D08WFACXX:3:250018880	7.665	7.609	7.902	7.897	72.931	72.659	0.884	1.408	231.54	233.181	109.656	110.327	0.472	0.472	1.019	1.047	2.581	2.598
IMAS-247:D08WFACXX:3:250018881	7.442	7.311	7.548	7.399	72.857	72.638	0.539	0.662	227.112	227.69	108.282	108.624	0.476	0.477	0.987	0.961	2.546	2.529
IMAS-248:D08WFACXX:3:250018882	8.05	8.182	8.076	8.144	72.866	72.645	-0.183	-0.623	227.918	228.476	107.82	107.887	0.472	0.471	1.006	1.004	2.391	2.285
IMAS-249:D08WFACXX:3:250018883	7.839	7.893	7.955	7.978	73.727	73.781	0.111	-0.166	221.593	220.849	107.218	107.202	0.478	0.479	0.984	0.94	2.442	2.393
IMAS-25:D08WFACXX:1:250018618	8.144	8.383	8.254	8.454	73.301	73.223	-0.26	-0.939	222.684	222.472	103.887	103.31	0.469	0.467	0.989	0.954	2.482	2.366
IMAS-250:D08WFACXX:3:250018884	7.488	7.392	7.506	7.361	72.967	72.827	0.401	0.411	222.589	222.505	98.803	97.925	0.445	0.439	1.028	1.055	2.313	2.202
IMAS-251:D08WFACXX:3:250018885	7.723	7.715	7.983	8.024	74.626	75.033	0.154	-0.058	218.881	217.88	105.909	105.753	0.478	0.479	0.978	0.938	2.196	2.043
IMAS-252:D08WFACXX:3:250018886	7.57	7.485	7.484	7.28	73.169	73.049	0.276	0.188	219.623	219.081	98.206	96.837	0.451	0.444	1.007	1.008	2.026	1.715
IMAS-253:D08WFACXX:3:250018887	7.44	7.31	7.485	7.319	73.084	72.926	0.06	-0.162	223.835	223.819	105.601	105.515	0.47	0.469	1.022	1.041	2.236	2.099
IMAS-254:D08WFACXX:3:250018888	7.426	7.262	7.498	7.293	73.24	73.113	0.367	0.361	222.106	221.741	106.32	106.278	0.465	0.462	0.995	0.975	2.53	2.514
IMAS-255:D08WFACXX:3:250018889	8.127	8.278	8.6	8.867	73.271	73.193	0.552	0.668	226.89	227.354	106.435	106.401	0.468	0.466	1.022	1.042	2.303	2.178
IMAS-256:D08WFACXX:3:250018890	8.163	8.363	8.259	8.42	73.606	73.603	0.301	0.231	229.65	230.427	113.014	113.904	0.486	0.489	1.027	1.057	2.318	2.174
IMAS-257:D08WFACXX:3:250018891	7.7	7.664	7.721	7.604	73.421	73.344	0.091	-0.225	222.454	222.071	105.41	105.129	0.474	0.473	0.983	0.936	2.476	2.35
IMAS-258:D08WFACXX:3:250018892	7.292	7.093	7.673	7.568	73.377	73.322	0.188	0.054	214.847	213.386	99.42	98.347	0.458	0.455	0.992	0.975	2.544	2.533
IMAS-259:D08WFACXX:3:250018893	8.015	8.121	8.101	8.17	73.07	72.933	0.231	0.126	218.781	217.922	101.614	100.874	0.463	0.46	0.979	0.945	2.028	1.797
IMAS-26:D08WFACXX:1:250018590	6.554	5.803	6.73	6.025	72.317	71.783	0.886	1.399	210.793	207.896	92.521	89.343	0.44	0.428	0.993	0.964	2.522	2.469
IMAS-260:D08WFACXX:3:250018894	8.165	8.343	8.334	8.5	73.574	73.583	0.224	0.111	226.984	227.375	110.991	111.659	0.488	0.491	1.003	0.998	2.201	2.037
IMAS-261:D08WFACXX:3:250018895	7.344	7.183	7.685	7.602	72.808	72.599	0.344	0.316	221.079	220.561	107.81	107.946	0.486	0.489	0.976	0.939	2.574	2.581
IMAS-262:D08WFACXX:3:250018896	7.197	6.855	7.19	6.771	72.958	72.666	-0.052	-0.508	214.583	212.543	97.724	95.803	0.458	0.452	1.024	1.061	2.916	3.077
IMAS-263:D08WFACXX:3:250018897	8.389	9.011	8.62	9.266	72.671	72.061	0.477	0.627	218.934	217.239	107.221	107.397	0.488	0.495	0.97	0.88	2.239	2.106
IMAS-264:D08WFACXX:3:250018898	6.78	6.209	7.153	6.729	73.528	73.545	0.424	0.477	219.686	218.86	103.953	103.438	0.467	0.464	1.026	1.068	2.888	3.021
IMAS-265:D08WFACXX:3:250018899	7.82	7.872	7.638	7.445	73.285	73.115	0.317	0.231	229.923	231.336	106.061	105.918	0.468	0.466	1.003	0.997	2.365	2.252
IMAS-266:D08WFACXX:3:250018900	8.932	10.437	9.051	10.422	74.092	74.558	0.895	1.967	234.891	239.622	114.13	116.841	0.483	0.488	1.051	1.2	2.231	2.046
IMAS-267:D08WFACXX:3:250018901	7.637	7.595	7.673	7.558	74.013	74.23	0.086	-0.217	226.009	226.597	107.038	107.284	0.467	0.464	0.993	0.966	2.635	2.652
IMAS-268:D08WFACXX:3:250018902	7.963	8.252	7.763	7.605	72.495	71.549	0.355	0.289	223.869	223.994	104.792	104.268	0.47	0.468	0.988	0.929	3.097	3.385
IMAS-27:D08WFACXX:1:250018591	8.168	8.373	8.709	9.07	74.794	75.199	0.581	0.747	222.987	222.782	103.951	103.5	0.466	0.464	0.995	0.979	2.17	1.944
IMAS-270:D08WFACXX:3:250018904	8.19	8.533	8.27	8.534	74.301	74.677	0.394	0.405	216.617	214.703	109.156	109.981	0.501	0.513	1.021	1.059	2.247	2.07
IMAS-271:D08WFACXX:3:250018905	8.519	8.857	8.612	8.899	74.04	74.168	0.479	0.552	225.932	226.161	111.112	111.689	0.49	0.494	1.018	1.035	2.107	1.913
IMAS-272:D08WFACXX:3:250018906	7.382	7.141	7.617	7.445	73.516	73.501	0.651	0.987	224.593	224.801	102.228	101.337	0.458	0.451	1.051	1.142	2.448	2.384
IMAS-273:D08WFACXX:3:250018907	7.864	7.97	7.78	7.731	73.145	72.975	0.522	0.663	221.883	221.568	103.921	103.494	0.471	0.471	0.994	0.97	2.584	2.587
IMAS-274:D08WFACXX:3:250018908	7.294	6.872	7.438	7.018	72.722	72.169	0.225	-0.036	223.582	223.352	98.778	96.549	0.442	0.427	0.969	0.875	2.224	2.095
IMAS-275:D08WFACXX:3:250018909	7.79	7.818	8.201	8.354	73.481	73.425	0.621	0.837	229.302	230.268	110.046	110.62	0.476	0.476	0.999	0.986	2.075	1.882
IMAS-276:D08WFACXX:3:250018910	8.306	8.832	8.446	8.921	74.34	74.843	0.247	0.032	231.801	234.422	108.987	109.641	0.469	0.466	0.999	0.983	2.478	2.437
IMAS-277:D08WFACXX:3:250018911	8.231	8.614	8.336	8.647	73.264	73.076	0.21	-0.003	217.156	215.318	111.013	112.19	0.485	0.49	1.038	1.116	2.183	1.968
IMAS-278:D08WFACXX:3:250018912	7.86	7.935	8.288	8.49	73.191	73.051	0.472	0.551	224.529	224.726	104.365	104.024	0.463	0.459	1	0.99	2.014	1.7
IMAS-279:D08WFACXX:3:250018913	8.517	8.993	8.508	8.86	73.878	73.996	0.372	0.355	227.865	228.593	105.438	104.998	0.465	0.46	0.991	0.96	2.029	1.81
IMAS-28:D08WFACXX:1:250018592	6.779	6.38	6.994	6.64	73.71	73.761	0.614	0.766	220.204	219.65	103.289	102.863	0.471	0.47	0.987	0.963	2.763	2.848
IMAS-280:D08WFACXX:3:250018914	7.645	7.593	8.002	8.039	72.752	72.464	0.385	0.385	225.396	225.519	107.905	108.044	0.475	0.474	0.989	0.966	2.166	1.953
IMAS-281:D08WFACXX:3:250018915	8.028	8.408	8.433	9.077	74.759	75.798	0.356	0.294	221.794	220.905	104.97	104.49	0.474	0.473	0.988	0.93	2.034	1.737
IMAS-282:D08WFACXX:3:250018916	8.232	8.6	8.21	8.43	74.192	74.515	0.76	1.222	230.051	231.555	108.985	109.504	0.471	0.47	1.001	0.991	2.138	1.903
IMAS-283:D08WFACXX:3:250018917	7.761	7.815	8.047	8.245	74.135	74.667	0.928	2.06	234.943	239.574	113.946	116.732	0.482	0.488	1.099	1.409	2.463	2.406
IMAS-284:D08WFACXX:3:250018918	8.274	8.545	8.505	8.792	74.593	74.982	1.472	2.443	230.027	230.906	109.186	109.537	0.475	0.475	1.053	1.131	2.473	2.426
IMAS-285:D08WFACXX:3:250018919	7.573	7.501	7.618	7.502	73.197	73.067	0.314	0.257	216.365	215.014	99.989	98.822	0.463	0.46	1.018	1.035	2.669	2.708
IMAS-286:D08WFACXX:3:250018920	7.101	6.71	7.448	7.184	74.367	74.713	0.463	0.556	228.328	229.238	102.157	101.175	0.466	0.462	0.981	0.931	2.413	2.335
IMAS-287:D08WFACXX:3:250018921	7.804	7.872	8.007	8.104	74.694	75.415	0.447	0.554	205.486	199.718	92.793	89.073	0.455	0.446	1.003	0.996	2.432	2.378
IMAS-288:D08WFACXX:3:250018922	8.005	8.358	8.203	8.575	73.18	72.853	0.577	0.973	225.356	225.737	103.517	102.395	0.459	0.45	1.007	1.01	2.671	2.73
IMAS-289:D08WFACXX:4:250018954	8.267	8.596	8.502	8.853	72.757	72.379	0.437	0.505	216.1	214.321	102.438	101.517	0.476	0.476	1.023	1.057	2.537	2.529
IMAS-29:D08WFACXX:1:250018593	7.804	7.823	7.822	7.78	73.428	73.362	0.206	0.071	221.533	221.046	101.873	101.084	0.466	0.463	1.004	1	2.579	2.586
IMAS-290:D08WFACXX:4:250018955	7.568	7.508	7.663	7.585	73.196	73.104	0.797	1.084	215.912	214.83	98.315	97.282	0.455	0.45	1.009	1.012	2.224	2.08
IMAS-291:D08WFACXX:4:250018956	8.107	8.258	8.174	8.275	72.168	71.767	0.377	0.376	218.476	217.744	104.778	104.562	0.479	0.48	1.026	1.052	2.324	2.239
IMAS-292:D08WFACXX:4:250018992	7.376	7.151	7.454	7.196	73.203	73.04	0.42	0.458	223.737	223.718	107.137	107.342	0.479	0.481	0.985	0.944	2.425	2.367
IMAS-293:D08WFACXX:4:250018993	7.881	7.95	7.746	7.697	73.694	73.742	0.43	0.461	228.639	229.367	104.28	104.063	0.462	0.459	1.023	1.043	2.448	2.4
IMAS-294:D08WFACXX:4:250018957	7.394	7.244	7.745	7.677	73.127	72.992	0.282	0.208	218.595	217.827	103.699	103.332	0.475	0.475	1.011	1.017	2.655	2.702
IMAS-295:D08WFACXX:4:250018994	7.465	7.334	7.503	7.328	73.349	73.28	0.331	0.301	227.928	228.268	107.684	107.776	0.471	0.47	1.011	1.017	2.549	2.539
IMAS-296:D08WFACXX:4:250018958	7.709	7.704	7.652	7.533	72.37	71.919	0.334	0.272	227.632	228.181	100.952	99.881	0.446	0.437	0.991	0.966	2.093	1.921
IMAS-297:D08WFACXX:4:250018995	8.169	8.455	8.284	8.532	72.855	72.538	0.111	-0.182	227.037	227.675	107.952	108.22	0.474	0.474	1.042	1.102	1.938	1.673
IMAS-298:D08WFACXX:4:250018959	7.472	7.331	7.603	7.448	74.113	74.302	0.465	0.527	225.575	225.764	101.471	100.469	0.46	0.456	1.003	0.998	2.889	3.072
IMAS-299:D08WFACXX:4:250018960	6.996	6.695	7.138	6.852	71.654	71.123	0.777	1.055	222.251	222.081	99.166	98.096	0.451	0.445	0.976	0.939	3.058	3.262
IMAS-3:D08WFACXX:1:250018575	8.525	8.863	8.487	8.725	73.481	73.44	0.749	1.004	223.483	223.338	108.452	108.678	0.484	0.486	1.022	1.042	2.434	2.383
IMAS-300:D08WFACXX:4:250018961	7.647	7.595	8.052	8.138	73.351	73.261	0.726	1.093	237.486	240.424	112.735	114.095	0.475	0.475	0.97	0.897	2.399	2.317
IMAS-301:D08WFACXX:4:250018962	7.958	8.064	8.063	8.139	73.434	73.376	0.711	0.997	226.6	226.997	106.564	106.389	0.463	0.459	1.005	1.004	2.187	2.044
IMAS-302:D08WFACXX:4:250018963	8.33	8.581	8.305	8.47	73.251	73.162	0.923	1.309	238.622	240.704	109.419	109.814	0.455	0.45	0.991	0.973	2.292	2.178
IMAS-303:D08WFACXX:4:250018964	7.719	7.699	8.217	8.328	72.631	72.342	0.582	0.718	230.855	231.765	103.831	103.382	0.448	0.441	0.996	0.984	2.302	2.196
IMAS-304:D08WFACXX:4:250018965	7.593	7.432	7.97	8.06	72.126	70.857	0.504	0.749	221.963	221.07	103.524	102.362	0.467	0.462	1.008	1.017	2.542	2.536
IMAS-305:D08WFACXX:4:250018996	8.132	8.371	8.031	8.104	72.398	71.932	0.494	0.612	230.245	231.61	103.33	102.648	0.453	0.445	0.997	0.977	2.121	1.882
IMAS-306:D08WFACXX:4:250018997	7.875	8.052	8.272	8.706	73.955	74.255	0.525	0.814	227.956	229.579	110.821	112.213	0.485	0.491	1.021	1.073	2.428	2.368
IMAS-307:D08WFACXX:4:250018998	8.075	8.266	8.443	8.74	73.248	73.126	0.441	0.511	234.174	236.235	101.704	100.624	0.443	0.432	1	0.987	2.299	2.146
IMAS-308:D08WFACXX:4:250018966	7.692	7.676	7.645	7.55	73.603	73.636	0.537	0.644	232.549	233.711	104.742	104.496	0.452	0.446	1.004	1.002	2.712	2.766
IMAS-309:D08WFACXX:4:250018967	7.597	7.514	7.716	7.612	73.109	72.921	0.446	0.518	209.873	206.966	98.053	96.249	0.468	0.466	1.009	1.015	2.186	1.977
IMAS-31:D08WFACXX:1:250018595	6.656	5.84	6.793	6	73.612	73.632	0.212	-0.001	209.209	205.316	101.818	100.424	0.489	0.496	0.985	0.932	NA	NA
IMAS-310:D08WFACXX:4:250018968	7.94	8.021	8.286	8.436	73.106	72.97	0.295	0.235	228.254	228.931	104.269	103.958	0.455	0.451	0.996	0.982	2.42	2.363
IMAS-311:D08WFACXX:4:250018969	7.37	7.138	7.539	7.326	73.962	74.166	0.659	0.942	217.669	216.217	102.088	100.937	0.46	0.454	0.988	0.95	2.257	2.135
IMAS-312:D08WFACXX:4:250018970	8.053	8.179	8.224	8.343	74.851	75.224	0.415	0.441	229.573	230.343	107.378	107.436	0.467	0.465	1.012	1.019	2.513	2.496
IMAS-313:D08WFACXX:4:250018999	7.271	6.847	7.755	7.64	73.616	73.618	0.097	-0.364	217.14	214.744	100.099	98.203	0.462	0.456	1.043	1.136	2.213	2.067
IMAS-314:D08WFACXX:4:250018971	8.436	9.328	8.276	8.726	73.677	73.736	0.211	-0.147	218.878	216.445	107.208	107.317	0.482	0.486	1.001	0.985	2.599	2.612
IMAS-315:D08WFACXX:4:250018972	7.623	7.584	7.635	7.536	72.872	72.668	0.74	0.99	225.018	225.19	103.523	103.082	0.461	0.458	0.989	0.967	2.273	2.154
IMAS-316:D08WFACXX:4:250018973	7.518	7.326	7.549	7.246	73.864	74.032	0.986	1.925	227.931	229.355	108.577	109.211	0.477	0.478	0.996	0.97	2.405	2.344
IMAS-317:D08WFACXX:4:250018974	7.397	7.244	7.457	7.273	72.976	72.809	0.382	0.381	231.055	232.31	101.468	100.636	0.444	0.436	0.996	0.981	2.655	2.7
IMAS-318:D08WFACXX:4:250018975	7.851	7.928	8.153	8.294	73.331	73.276	0.448	0.502	236.799	239.135	111.437	112.433	0.473	0.473	0.996	0.981	1.923	1.564
IMAS-319:D08WFACXX:4:250018976	7.922	8.164	8.236	8.637	74.037	74.408	0.368	0.341	224.208	224.455	103.737	102.838	0.464	0.457	0.995	0.958	2.505	2.471
IMAS-32:D08WFACXX:1:250018596	7.276	6.973	7.515	7.276	73.379	73.307	0.306	0.217	217.209	215.634	101.418	100.082	0.472	0.47	0.992	0.963	2.473	2.343
IMAS-320:D08WFACXX:4:250018977	7.204	5.189	7.345	5.371	72.538	69.852	0.473	0.976	210.63	193.331	96.864	86.1	0.462	0.439	1	0.942	2.652	2.82
IMAS-321:D08WFACXX:4:250018978	6.379	5.822	6.334	5.726	73.705	73.729	0.502	0.587	212.401	210.861	105.322	105.168	0.491	0.494	0.986	0.961	2.435	2.378
IMAS-322:D08WFACXX:4:250018979	8.258	8.503	8.341	8.534	73.707	73.751	0.393	0.406	225.367	225.536	104.381	103.965	0.465	0.462	0.986	0.956	2.778	2.9
IMAS-323:D08WFACXX:4:250018980	7.304	7.034	7.868	7.841	74.28	74.574	0.806	1.247	226.834	227.46	106.194	106.1	0.467	0.464	1.01	1.019	2.353	2.273
IMAS-324:D08WFACXX:4:250018981	7.457	7.222	7.534	7.237	73.636	73.711	0.719	1.233	220.975	220.056	109.856	110.796	0.492	0.5	0.973	0.89	2.71	2.764
IMAS-325:D08WFACXX:4:250018982	7.853	7.938	8.167	8.35	73.624	73.647	0.488	0.612	236.58	239.798	116.594	118.688	0.491	0.496	1.055	1.152	2.733	2.813
IMAS-326:D08WFACXX:4:250018983	8.015	8.303	8.426	8.912	74.069	74.366	0.291	0.142	228.78	230.356	111.59	113.074	0.487	0.493	1.095	1.318	2.335	2.228
IMAS-327:D08WFACXX:4:250018984	7.702	7.69	7.982	8.04	74.162	74.39	0.735	1.106	217.72	216.254	106.4	106.296	0.472	0.471	1.008	1.012	2.09	1.889
IMAS-328:D08WFACXX:4:250019000	8.043	8.275	8.095	8.236	73.726	73.832	0.408	0.445	221.562	220.9	104.564	104.082	0.473	0.473	1.013	1.027	2.272	2.146
IMAS-329:D08WFACXX:4:250018985	8.173	8.464	8.171	8.342	74.322	74.657	0.811	1.256	216.999	215.623	103.947	103.432	0.478	0.479	1.008	1.012	2.59	2.607
IMAS-33:D08WFACXX:1:250018597	7.651	7.61	7.742	7.674	73.459	73.419	0.502	0.58	211.464	209.476	102.05	101.336	0.481	0.482	0.98	0.947	2.368	2.279
IMAS-330:D08WFACXX:4:250019001	7.737	7.723	7.873	7.832	73.545	73.502	0.864	1.865	234.665	239.246	117.696	121.657	0.497	0.51	1.035	1.133	2.592	2.604
IMAS-331:D08WFACXX:4:250018986	7.259	7.037	7.456	7.261	72.252	71.815	1.144	1.745	218.708	217.848	104.884	104.578	0.478	0.479	0.99	0.966	2.417	2.317
IMAS-332:D08WFACXX:4:250018987	7.873	7.983	7.941	7.98	73.848	74.009	0.254	0.106	226.881	227.662	117.003	119.771	0.512	0.53	1.004	0.999	2.589	2.59
IMAS-334:D08WFACXX:4:250018989	8.077	8.405	7.94	7.977	73.027	72.678	0.404	0.423	214.09	210.864	100.668	99.043	0.472	0.471	0.976	0.898	2.527	2.526
IMAS-335:D08WFACXX:4:250018990	7.441	7.315	7.841	7.813	73.2	73.089	0.54	0.649	219.369	218.722	104.582	104.218	0.474	0.473	1.001	0.994	2.695	2.748
IMAS-336:D08WFACXX:4:250018991	6.642	5.826	6.878	6.163	73.131	72.887	0.241	0.05	217.358	215.546	99.85	98.365	0.461	0.456	0.999	0.987	2.769	2.861
IMAS-337:D08WFACXX:4:250019002	7.42	7.299	7.681	7.602	73.963	74.095	0.358	0.344	226.985	227.384	106.835	106.86	0.472	0.471	0.973	0.93	2.084	1.875
IMAS-338:D08WFACXX:4:250019003	8.026	8.231	8.352	8.661	71.623	70.578	0.373	0.358	226.065	226.396	110.783	111.549	0.49	0.495	1.006	1.007	2.29	2.166
IMAS-339:D08WFACXX:4:250019004	8.347	9.157	8.727	9.734	74.313	74.952	0.498	0.732	227.334	228.888	104.978	104.409	0.463	0.457	1.013	1.037	2.161	1.934
IMAS-34:D08WFACXX:1:250018598	7.27	7.082	7.55	7.42	73.993	74.116	0.753	1.022	219.729	219.199	107.245	107.324	0.487	0.489	1.004	1	2.08	1.872
IMAS-340:D08WFACXX:4:250019005	7.073	6.454	7.537	7.214	75.456	76.654	-1.136	-3.529	219.957	218.823	110.206	111.121	0.495	0.503	1.017	1.045	2.674	2.724
IMAS-341:D08WFACXX:4:250019006	8.006	8.314	8.156	8.42	75.212	76.669	0.483	0.676	224.826	225.288	107.362	107.691	0.474	0.474	1.028	1.101	2.481	2.333
IMAS-342:D08WFACXX:4:250019007	7.356	7.216	7.442	7.279	73.268	73.192	0.506	0.591	215.141	214.087	98.775	97.788	0.454	0.449	1.022	1.041	2.752	2.818
IMAS-343:D08WFACXX:4:250019008	8.101	8.482	8.322	8.737	72.701	72.125	0.356	0.306	225.832	226.473	109.028	109.732	0.479	0.481	0.999	0.981	2.403	2.335
IMAS-344:D08WFACXX:4:250019009	7.779	7.848	8.057	8.25	73.119	72.747	0.831	1.775	230.824	233.483	119.963	124.705	0.51	0.532	0.992	0.949	2.482	2.425
IMAS-345:D08WFACXX:4:250019010	7.357	7.06	7.961	7.988	74.748	75.345	1.024	1.819	239.608	243.406	121.117	124.864	0.504	0.516	0.981	0.919	NA	NA
IMAS-346:D08WFACXX:4:250019011	7.478	7.196	7.376	6.874	73.791	73.904	0.006	-0.584	226.038	226.246	115.881	118.144	0.505	0.519	1.021	1.059	2.772	2.89
IMAS-347:D08WFACXX:4:250019012	7.543	7.41	8.018	8.086	75.204	75.968	1.325	2.396	244.283	248.841	123.652	127.639	0.502	0.513	0.963	0.869	2.17	1.949
IMAS-348:D08WFACXX:4:250019013	7.176	6.954	7.396	7.206	75.293	75.817	0.974	1.386	233.167	234.477	115.678	116.905	0.495	0.5	0.96	0.902	2.282	2.161
IMAS-349:D08WFACXX:4:250019014	8.046	8.447	8.32	8.818	73.298	73.046	0.307	0.156	237.054	242.789	120.435	125.678	0.5	0.516	1.01	1.023	2.257	2.074
IMAS-35:D08WFACXX:1:250018599	8.172	8.437	8.152	8.291	72.8	72.429	0.324	0.264	220.817	220.012	101.483	100.228	0.464	0.46	1.017	1.037	2.469	2.428
IMAS-350:D08WFACXX:4:250019015	7.539	7.393	7.632	7.441	75.237	76.115	0.662	1.02	247.304	253.309	122.514	126.859	0.504	0.518	1.005	1.001	2.16	1.929
IMAS-351:D08WFACXX:4:250019016	8.149	8.382	8.43	8.71	74.604	74.978	0.414	0.441	238.031	240.591	122.068	124.523	0.506	0.514	1.022	1.045	2.021	1.794
IMAS-354:D08WFACXX:4:250019019	7.773	7.788	7.719	7.65	73.704	73.73	0.41	0.43	232.325	233.604	113.931	114.94	0.491	0.495	0.998	0.988	2.22	2.07
IMAS-355:D08WFACXX:4:250019020	8.718	9.965	8.81	9.902	73.137	72.786	0.505	0.748	243.558	251.794	129.596	137.899	0.521	0.549	0.993	0.95	2.365	2.253
IMAS-359:D08WFACXX:4:250019024	8.599	9.676	8.819	9.893	74.09	74.536	0.317	0.176	224.182	224.175	108.345	108.99	0.483	0.488	0.995	0.958	1.983	1.657
IMAS-36:D08WFACXX:1:250018600	7.626	7.505	7.694	7.5	73.207	72.983	0.5	0.675	207.735	202.372	95.319	90.909	0.464	0.456	0.997	0.966	2.403	2.162
IMAS-361:D08WFACXX:4:250019026	8.019	8.161	8.128	8.237	74.772	75.217	0.295	0.212	235.735	237.92	121.59	123.9	0.506	0.514	0.984	0.952	2.179	2.023
IMAS-362:D08WFACXX:4:250019027	7.977	8.081	8.175	8.286	73.622	73.659	0.723	0.96	220.428	219.86	110.739	111.28	0.5	0.506	1.008	1.01	2.58	2.58
IMAS-363:D08WFACXX:4:250019028	8.25	8.463	8.298	8.456	73.39	73.34	1.046	1.507	228.344	228.981	108.806	109.082	0.476	0.476	1.01	1.014	2.544	2.54
IMAS-364:D08WFACXX:4:250019029	9.535	11.804	9.501	11.401	74.186	74.719	0.512	0.789	241.163	248.397	129.86	138.307	0.524	0.554	1.004	0.998	2.07	1.806
IMAS-365:D08WFACXX:4:250019030	8.423	8.793	8.64	9.013	73.308	73.221	0.299	0.224	231.451	232.86	111.155	111.9	0.479	0.48	1.001	0.992	2.605	2.616
IMAS-366:D08WFACXX:4:250019031	7.614	7.144	7.757	7.238	74.972	78.647	0.53	1.413	230.013	237.709	105.391	103.853	0.462	0.437	1.006	1.001	NA	NA
IMAS-367:D08WFACXX:4:250019032	7.443	6.265	7.612	6.508	74.194	75.837	0.539	1.494	227.413	231.133	110.297	113.804	0.48	0.488	1.006	1.002	NA	NA
IMAS-368:D08WFACXX:4:250019033	8.184	8.414	8.245	8.412	74.238	74.466	0.493	0.589	230.366	231.532	112.681	113.74	0.478	0.479	1.018	1.039	2.322	2.183
IMAS-369:D08WFACXX:4:250019034	7.618	7.567	7.734	7.671	73.382	73.328	0.143	-0.031	215.049	213.83	100.121	99.158	0.464	0.461	1.001	0.994	2.567	2.559
IMAS-37:D08WFACXX:1:250018601	8.187	8.362	8.328	8.488	74.344	74.589	-0.018	-0.291	228.453	229.035	117.147	118.51	0.508	0.515	0.948	0.876	2.335	2.237
IMAS-370:D08WFACXX:4:250019035	7.916	8.066	8.183	8.395	73.983	74.198	0.695	1.091	233.561	236.075	118.155	121.408	0.507	0.522	1.019	1.052	2.348	2.224
IMAS-371:D08WFACXX:4:250019036	8.097	8.337	8.078	8.193	73.249	73.102	0.754	1.154	234.741	236.983	116.535	118.664	0.492	0.499	0.988	0.953	2.728	2.823
IMAS-372:D08WFACXX:4:250019037	7.835	7.948	7.877	7.834	74.067	74.484	0.323	0.195	223.359	222.923	111.096	112.732	0.493	0.505	1.003	0.994	2.68	2.734
IMAS-373:D08WFACXX:4:250019038	7.628	7.534	7.741	7.609	74.487	75.067	0.455	0.563	226.725	227.353	110.018	110.904	0.485	0.49	1.012	1.028	2.188	2.039
IMAS-374:D08WFACXX:4:250019039	8.031	8.305	8.123	8.323	74.525	75.162	0.358	0.316	242.534	248.452	126.275	131.664	0.513	0.53	1	0.984	2.351	2.259
IMAS-375:D08WFACXX:4:250019040	7.867	7.92	8.071	8.136	75.459	76.027	0.421	0.446	229.459	230.229	123.515	125.832	0.529	0.542	0.976	0.938	2.232	2.101
IMAS-376:D08WFACXX:4:250019041	7.675	7.649	7.935	7.964	74.623	75.103	0.172	-0.039	230.677	232.223	114.661	116.525	0.49	0.495	0.996	0.977	2.448	2.37
IMAS-377:D08WFACXX:4:250019042	8.263	8.937	8.529	9.292	73.265	72.997	0.682	1.32	229.448	231.855	110.95	112.635	0.48	0.484	1.005	1.005	2.218	2.02
IMAS-378:D08WFACXX:4:250019043	7.338	7.092	7.462	7.204	74.834	75.4	0.872	1.384	224.349	224.56	106.664	106.807	0.473	0.473	0.992	0.963	2.201	2.042
IMAS-379:D08WFACXX:4:250019044	6.808	6.371	6.727	6.205	72.249	71.811	0.061	-0.19	220.111	219.467	101.93	101.193	0.461	0.457	0.988	0.961	2.605	2.617
IMAS-38:D08WFACXX:1:250018602	7.513	7.43	7.51	7.365	71.925	71.44	0.399	0.404	203.716	200.779	96.132	94.611	0.472	0.471	0.986	0.961	2.401	2.323
IMAS-380:D08WFACXX:4:250019045	7.73	7.701	7.928	7.916	74.511	74.786	0.754	1.013	234.339	235.733	119.867	121.612	0.509	0.517	1.007	1.009	2.169	2.005
IMAS-381:D08WFACXX:4:250019046	7.468	7.223	7.56	7.265	74.998	75.922	0.569	0.836	233.22	236.001	118.742	121.857	0.501	0.512	0.975	0.897	2.442	2.243
IMAS-382:D08WFACXX:4:250019047	6.15	4.661	6.378	5.029	75.466	76.693	0.985	1.902	213.2	209.492	102.498	101.276	0.484	0.488	0.974	0.894	2.475	2.354
IMAS-383:D08WFACXX:4:250019048	7.39	7.213	7.752	7.68	75.774	76.576	1.768	3.006	253.47	258.746	132.664	137.385	0.521	0.535	0.99	0.963	2.254	2.079
IMAS-387:D08WFACXX:5:250019083	7.724	7.699	7.801	7.744	73.498	73.44	0.7	0.913	238.123	239.87	114.116	114.974	0.478	0.479	1.02	1.037	2.41	2.352
IMAS-388:D08WFACXX:5:250019119	7.657	7.611	7.774	7.714	73.425	73.401	0.92	1.293	227.259	227.814	108.018	108.279	0.475	0.475	1.008	1.009	2.582	2.591
IMAS-389:D08WFACXX:5:250019120	7.411	7.022	7.668	7.405	73.319	73.092	0.528	0.834	223.553	223.218	103.467	102.147	0.466	0.46	0.999	0.976	2.883	3.053
IMAS-39:D08WFACXX:1:250018603	7.894	7.949	8	8.022	72.653	72.378	0.113	-0.076	219.263	218.496	107.57	107.739	0.494	0.499	0.988	0.965	2.686	2.741
IMAS-390:D08WFACXX:5:250019084	7.812	7.843	7.976	8.006	74.655	74.96	0.861	1.191	234.435	235.829	116.261	117.511	0.491	0.495	0.994	0.978	2.333	2.24
IMAS-391:D08WFACXX:5:250019121	7.366	7.172	7.44	7.208	74.392	74.707	0.247	0.123	221.771	221.304	108.759	109.138	0.485	0.487	1.03	1.065	2.394	2.33
IMAS-392:D08WFACXX:5:250019085	8.077	8.237	8.304	8.481	74.181	74.366	0.573	0.728	232.65	234.073	116.254	117.717	0.494	0.499	1	0.991	2.595	2.627
IMAS-393:D08WFACXX:5:250019122	7.983	8.18	8.039	8.142	72.703	72.217	0.963	1.692	226.282	226.838	115.534	117.956	0.513	0.531	1.004	1	2.586	2.601
IMAS-394:D08WFACXX:5:250019086	7.89	8.052	7.892	7.897	73.575	73.577	0.442	0.535	228.388	229.686	108.597	109.076	0.474	0.474	0.994	0.964	2.526	2.514
IMAS-395:D08WFACXX:5:250019087	7.642	7.596	7.92	7.922	72.656	72.387	0.535	0.639	223.888	223.873	99.559	98.514	0.448	0.441	0.984	0.955	2.372	2.291
IMAS-396:D08WFACXX:5:250019088	8.538	8.917	8.622	8.944	73.17	73.042	0.552	0.692	225.295	225.577	108.082	108.338	0.476	0.477	1.011	1.017	2.456	2.391
IMAS-397:D08WFACXX:5:250019089	7.606	7.518	8.046	8.153	73.734	73.834	1.206	2.249	245.268	250.873	117.748	120.961	0.481	0.484	0.989	0.946	2.237	2.053
IMAS-398:D08WFACXX:5:250019090	7.491	7.356	7.781	7.714	73.374	73.3	0.758	1.096	231.702	233.13	108.752	109.198	0.469	0.468	1.03	1.071	2.616	2.629
IMAS-399:D08WFACXX:5:250019091	7.662	7.614	7.944	7.981	73.446	73.371	0.534	0.718	236.079	239.253	118.656	121.374	0.496	0.504	1.011	1.021	2.39	2.276
IMAS-4:D08WFACXX:1:250018611	6.793	6.385	6.966	6.577	73.279	73.208	0.552	0.664	210.242	208.008	99.232	98.06	0.469	0.468	0.988	0.966	2.368	2.288
IMAS-40:D08WFACXX:1:250018619	7.977	8.071	8.416	8.615	74.049	74.208	-0.193	-0.596	220.519	220.028	101.382	100.713	0.465	0.462	1.002	0.998	2.96	3.123
IMAS-400:D08WFACXX:5:250019092	7.956	8.244	8.024	8.184	72.903	72.315	0.079	-0.556	233.671	237.87	113.065	115.507	0.486	0.493	0.993	0.95	2.285	2.116
IMAS-401:D08WFACXX:5:250019123	7.726	7.697	7.908	7.893	73.341	73.225	0.454	0.507	226.404	226.648	110.4	110.803	0.487	0.49	1.013	1.024	2.367	2.285
IMAS-402:D08WFACXX:5:250019124	7.232	6.622	7.532	7.115	73.878	74.146	0.371	0.349	225.482	226.458	110.95	112.699	0.49	0.5	1.021	1.072	2.287	2.143
IMAS-403:D08WFACXX:5:250019125	7.503	7.409	7.851	7.833	73.719	73.775	0.283	0.212	232.506	233.769	113.797	114.925	0.488	0.491	1.001	0.994	2.585	2.594
IMAS-404:D08WFACXX:5:250019093	7.528	7.384	8.282	8.566	72.957	72.651	0.251	0.081	222.275	221.984	102.942	102.241	0.462	0.458	1.036	1.097	2.51	2.484
IMAS-405:D08WFACXX:5:250019094	8.071	8.279	8.252	8.456	73.235	73.075	0.411	0.444	222.497	222.285	106.983	107.232	0.481	0.484	0.994	0.969	2.383	2.318
IMAS-406:D08WFACXX:5:250019095	7.656	7.575	7.639	7.406	73.652	73.737	0.981	1.923	219.79	218.628	112.165	113.873	0.506	0.521	1.044	1.138	2.453	2.391
IMAS-408:D08WFACXX:5:250019097	8.12	8.588	8.16	8.449	73.295	73.066	0.317	0.188	221.76	220.854	101.888	100.166	0.462	0.455	1.015	1.048	2.378	2.28
IMAS-409:D08WFACXX:5:250019126	8.09	8.228	8.056	8.104	73.091	72.965	1.005	1.437	222.901	222.58	112.791	113.596	0.494	0.498	1.009	1.012	2.046	1.837
IMAS-41:D08WFACXX:1:250018604	8.46	8.898	8.755	9.244	74.733	75.274	0.747	1.13	228.492	229.423	113.44	114.82	0.49	0.495	0.989	0.952	2.435	2.227
IMAS-410:D08WFACXX:5:250019098	7.518	7.427	7.679	7.592	73.024	72.855	0.453	0.495	221.252	220.796	110.534	111.065	0.498	0.504	1.022	1.042	2.786	2.888
IMAS-411:D08WFACXX:5:250019099	7.307	7.124	7.536	7.388	73.106	72.963	1.011	1.443	216.393	215.2	99.058	98.003	0.463	0.46	0.991	0.972	2.715	2.775
IMAS-412:D08WFACXX:5:250019100	8.052	8.171	8.003	8.035	73.902	74.013	0.633	0.803	213.354	211.798	101.577	100.887	0.477	0.478	1.017	1.031	2.483	2.451
IMAS-413:D08WFACXX:5:250019101	7.353	7.193	7.435	7.25	72.922	72.722	0.93	1.31	217.852	216.901	102.85	102.284	0.469	0.468	0.99	0.969	2.828	2.933
IMAS-414:D08WFACXX:5:250019102	8.187	8.512	8.226	8.447	73.368	73.263	0.224	0.04	238.869	242.529	122.394	126.594	0.509	0.525	1.005	1.002	2.344	2.22
IMAS-415:D08WFACXX:5:250019103	7.61	7.562	7.865	7.855	75.044	75.485	1.089	1.585	234.649	236.321	125.169	127.842	0.524	0.535	0.991	0.973	2.459	2.413
IMAS-416:D08WFACXX:5:250019104	7.889	7.961	8.149	8.274	74.564	74.985	0.789	1.207	220.184	219.194	105.5	105.087	0.472	0.471	1.019	1.044	2.661	2.828
IMAS-417:D08WFACXX:5:250019105	7.761	7.781	7.883	7.872	73.535	73.503	0.347	0.314	227.719	228.731	111.544	112.992	0.489	0.496	1.003	0.994	2.95	3.169
IMAS-418:D08WFACXX:5:250019106	8.244	8.458	8.287	8.443	73.852	73.918	0.453	0.496	225.019	225.047	111.822	112.434	0.496	0.501	1.032	1.065	2.572	2.571
IMAS-419:D08WFACXX:5:250019107	7.398	7.252	7.59	7.464	73.636	73.656	0.605	0.77	221.488	221.24	103.045	102.616	0.464	0.462	0.997	0.986	2.796	2.883
IMAS-42:D08WFACXX:1:250018620	6.893	6.371	6.879	6.283	71.403	70.51	0.623	0.864	208.288	205.016	91.703	88.49	0.443	0.432	1.018	1.041	2.461	2.282
IMAS-420:D08WFACXX:5:250019108	7.6	7.537	7.605	7.482	73.428	73.386	0.551	0.667	222.414	222.11	102.368	101.739	0.463	0.46	0.994	0.978	2.499	2.472
IMAS-421:D08WFACXX:5:250019109	8.149	8.322	8.119	8.204	73.31	73.255	0.444	0.483	221.672	221.317	107.094	107.148	0.481	0.482	0.984	0.956	2.652	2.692
IMAS-422:D08WFACXX:5:250019110	8.005	8.176	8.042	8.127	73.295	73.153	0.691	1.006	217.943	216.607	102.19	101.301	0.471	0.47	1.008	1.013	2.693	2.768
IMAS-423:D08WFACXX:5:250019111	7.65	7.624	7.747	7.696	75.428	75.979	0.883	1.236	229.134	229.985	113.997	115.096	0.495	0.5	0.978	0.942	2.289	2.183
IMAS-425:D08WFACXX:5:250019112	8.034	8.194	8.229	8.408	72.966	72.728	0.012	-0.378	218.721	217.609	113.234	114.618	0.498	0.506	1.006	1.005	2.806	3.216
IMAS-426:D08WFACXX:5:250019128	7.659	7.573	7.753	7.608	73.778	73.928	0.722	1.247	232.673	235.358	108.215	108.751	0.466	0.46	0.992	0.946	NA	NA
IMAS-427:D08WFACXX:5:250019113	8.105	8.323	8.222	8.407	73.028	72.816	0.247	0.101	233.416	235.552	112.157	113.342	0.481	0.483	1.006	1.005	2.83	3.282
IMAS-428:D08WFACXX:5:250019114	8.692	9.27	8.878	9.43	75.054	75.704	0.006	-0.402	225.501	225.799	112.614	113.867	0.496	0.503	0.987	0.947	2.592	2.642
IMAS-429:D08WFACXX:5:250019115	7.551	7.439	7.745	7.652	73.382	73.341	0.942	1.515	220.186	219.394	100.338	98.971	0.458	0.451	0.977	0.917	2.988	3.71
IMAS-43:D08WFACXX:1:250018605	8.23	8.525	8.677	9.121	74.914	75.484	0.697	1.02	228.784	229.713	110.944	111.841	0.485	0.489	1.005	1.003	2.647	2.793
IMAS-430:D08WFACXX:5:250019116	8.43	8.871	8.625	9.058	73.875	74.026	-0.049	-0.508	234.951	237.245	119.42	122.219	0.498	0.506	1.01	1.016	2.854	3.326
IMAS-44:D08WFACXX:1:250018606	7.805	7.835	8.081	8.18	75.534	76.394	-0.201	-0.817	224.242	224.155	106.225	105.984	0.472	0.47	1.001	0.99	2.465	2.321
IMAS-45:D08WFACXX:1:250018607	7.457	7.168	7.683	7.47	73.609	73.601	0.37	0.34	222.449	221.804	105.017	104.2	0.465	0.459	0.983	0.905	2.661	2.84
IMAS-47:D08WFACXX:1:250018609	7.054	6.771	6.81	6.384	72.738	72.502	-0.002	-0.273	230.938	231.871	109.743	110.095	0.475	0.475	1.014	1.024	3.057	3.258
IMAS-48:D08WFACXX:1:250018610	6.572	6.082	6.678	6.194	70.598	69.72	-0.068	-0.387	203.522	200.522	97.417	96.086	0.476	0.476	0.995	0.981	3.308	3.599
IMAS-49:D08WFACXX:1:250018621	8.311	8.548	8.497	8.728	74.25	74.425	0.387	0.38	232.71	233.783	114.914	115.924	0.491	0.495	1.018	1.033	2.574	2.573
IMAS-5:D08WFACXX:1:250018612	7.721	7.711	8.142	8.282	72.773	72.447	0.553	0.72	221.601	221.119	100.474	99.052	0.452	0.444	1.011	1.02	2.476	2.339
IMAS-50:D08WFACXX:1:250018622	7.474	7.366	7.789	7.748	73.413	73.373	0.163	0.005	225.324	225.467	105.558	105.39	0.47	0.469	0.989	0.968	3.172	3.421
IMAS-51:D08WFACXX:1:250018623	7.299	7.106	7.385	7.174	73.738	73.775	0.622	0.781	217.252	216.09	102.883	102.258	0.471	0.47	0.984	0.957	2.363	2.273
IMAS-52:D08WFACXX:1:250018624	7.528	7.45	7.656	7.57	73.597	73.603	0.48	0.536	228.271	228.889	110.672	111.145	0.485	0.487	0.967	0.918	2.365	2.289
IMAS-53:D08WFACXX:1:250018625	8.384	8.641	8.896	9.277	74.051	74.184	0.344	0.307	232.866	234.046	112.374	113.087	0.48	0.481	1.043	1.089	2.605	2.625
IMAS-54:D08WFACXX:1:250018626	7.263	7.063	7.633	7.528	71.932	71.468	0.208	0.078	220.004	219.533	104.435	104.105	0.471	0.469	1.003	0.999	2.741	2.813
IMAS-55:D08WFACXX:1:250018627	7.657	7.629	7.886	7.882	71.787	71.266	0.052	-0.189	216.247	215.01	98.669	97.509	0.447	0.441	0.996	0.985	3.128	3.367
IMAS-56:D08WFACXX:1:250018628	7.892	8.086	8.055	8.244	72.511	71.583	0.296	0.106	218.935	216.603	105.634	105.246	0.48	0.484	0.993	0.952	2.862	3.02
IMAS-57:D08WFACXX:1:250018629	7.437	7.316	7.819	7.791	74.763	75.108	0.7	0.917	220.044	219.505	107.814	108.013	0.484	0.487	0.972	0.93	2.402	2.351
IMAS-58:D08WFACXX:1:250018630	7.857	7.902	7.963	7.981	74.807	75.153	0.214	0.097	218.089	217.187	106.35	106.276	0.484	0.486	1.021	1.039	2.791	2.882
IMAS-59:D08WFACXX:1:250018631	8.667	9.052	8.782	9.125	74.543	74.861	0.417	0.447	218.643	217.986	106.444	106.617	0.485	0.488	1.007	1.009	2.253	2.123
IMAS-6:D08WFACXX:1:250018576	7.762	7.771	7.909	7.908	73.855	73.952	0.236	0.136	231.887	233.135	110.99	111.654	0.482	0.484	1	0.992	2.313	2.206
IMAS-60:D08WFACXX:1:250018632	7.82	7.857	8.079	8.151	74.762	75.115	0.481	0.549	226.181	226.411	101.427	100.746	0.45	0.445	0.987	0.963	2.625	2.64
IMAS-61:D08WFACXX:1:250018633	5.789	4.984	6.046	5.324	75.171	75.638	0.54	0.638	213.391	211.868	98.266	97.034	0.459	0.455	0.972	0.929	3.034	3.233
IMAS-62:D08WFACXX:1:250018634	8.644	9.015	9.045	9.489	75.418	75.958	0.154	-0.005	236.533	238.244	119.19	120.894	0.496	0.501	1.047	1.097	2.696	2.754
IMAS-63:D08WFACXX:1:250018635	8.226	8.425	8.566	8.825	74.742	75.096	0.329	0.288	239.631	241.847	117.486	118.908	0.49	0.494	0.999	0.989	2.929	3.089
IMAS-64:D08WFACXX:1:250018636	8.295	8.546	8.628	8.929	73.381	73.339	0.121	-0.068	228.037	228.545	114.188	115.195	0.502	0.508	1.022	1.041	2.564	2.558
IMAS-65:D08WFACXX:1:250018637	8.072	8.219	8.385	8.582	74.322	74.546	0.098	-0.107	228.893	229.588	113.271	114.153	0.495	0.5	1.021	1.04	2.657	2.696
IMAS-66:D08WFACXX:1:250018638	8.078	8.232	8.336	8.519	75.005	75.423	0.548	0.668	232.613	233.784	105.313	105.147	0.452	0.447	1.009	1.014	2.968	3.125
IMAS-67:D08WFACXX:1:250018639	7.493	7.401	7.642	7.549	74.318	74.542	0.37	0.359	214.064	212.749	99.846	98.946	0.468	0.466	1.002	0.997	2.378	2.293
IMAS-68:D08WFACXX:1:250018640	7.216	6.592	7.382	6.792	73.622	73.693	0.027	-0.723	220.446	219.186	112.538	115.023	0.503	0.521	0.987	0.923	3.142	3.454
IMAS-69:D08WFACXX:1:250018641	7.199	6.532	7.213	6.41	72.181	70.95	0.347	0.278	225.699	226.351	102.108	100.349	0.456	0.444	0.998	0.97	3.04	3.292
IMAS-7:D08WFACXX:1:250018613	8.617	9.004	8.644	8.953	73.712	73.779	0.267	0.195	229.039	229.819	108.591	108.896	0.47	0.469	1.013	1.021	2.161	1.988
IMAS-70:D08WFACXX:1:250018642	7.858	7.9	8.174	8.273	73.59	73.629	0.178	0.035	217.93	217.143	101.73	101.06	0.467	0.465	0.986	0.961	2.57	2.577
IMAS-71:D08WFACXX:1:250018643	8.066	8.513	8.02	8.187	73.298	73.07	0.401	0.435	227.416	228.993	112.538	114.804	0.495	0.508	0.99	0.936	2.648	2.7
IMAS-72:D08WFACXX:1:250018644	8.407	8.827	8.537	8.915	74.18	74.427	0.97	1.585	229.61	230.558	112.084	113.094	0.485	0.488	1.003	0.996	2.069	1.864
IMAS-73:D08WFACXX:1:250018645	6.516	5.988	6.738	6.262	72.684	72.427	0.454	0.498	201.229	197.693	91.19	88.889	0.449	0.443	0.983	0.952	2.922	3.077
IMAS-74:D08WFACXX:1:250018646	7.502	7.409	7.517	7.376	73.63	73.673	0.461	0.516	219.921	219.387	102.448	101.905	0.467	0.465	0.986	0.961	2.261	2.133
IMAS-75:D08WFACXX:1:250018647	9.04	9.569	9.225	9.729	74.845	75.201	0.225	0.107	230.159	230.792	115.178	116.24	0.495	0.5	0.977	0.94	2.309	2.2
IMAS-76:D08WFACXX:1:250018648	7.906	7.965	8.167	8.26	72.438	72.11	0.098	-0.105	226.697	226.993	103.152	102.597	0.458	0.454	0.995	0.981	2.371	2.293
IMAS-77:D08WFACXX:1:250018649	7.364	7.203	7.581	7.45	73.226	73.149	0.883	1.166	215.892	214.858	94.862	93.398	0.44	0.433	0.989	0.97	2.319	2.226
IMAS-78:D08WFACXX:1:250018650	7.375	7.145	7.606	7.429	74.397	74.742	0.103	-0.19	217.394	215.864	102.579	101.689	0.468	0.466	0.993	0.968	2.243	2.104
IMAS-79:D08WFACXX:1:250018651	7.636	7.608	7.615	7.517	73.068	72.929	0.26	0.171	212.951	211.415	107.763	107.916	0.499	0.504	0.979	0.946	1.91	1.641
IMAS-8:D08WFACXX:1:250018577	8.166	8.352	8.207	8.333	73.634	73.671	0.771	1.034	229.523	230.475	112.075	112.92	0.488	0.491	1	0.992	2.389	2.304
IMAS-80:D08WFACXX:1:250018652	8.098	8.244	8.631	8.919	74.404	74.641	0.426	0.446	231.295	232.303	115.797	116.977	0.499	0.504	1.005	1.005	2.686	2.739
IMAS-81:D08WFACXX:1:250018653	8.59	8.963	8.572	8.848	74.468	74.738	0.331	0.282	236.744	238.547	113.796	114.854	0.481	0.482	1.022	1.043	2.655	2.685
IMAS-82:D08WFACXX:1:250018654	8.029	8.178	8.316	8.518	73.615	73.646	0.179	-0.005	228.421	229.176	101.044	100.019	0.444	0.435	0.989	0.96	2.528	2.505
IMAS-83:D08WFACXX:1:250018655	8.148	8.33	8.348	8.534	74.268	74.473	0.381	0.376	227.466	228.116	108.674	109.122	0.48	0.482	1.022	1.041	2.564	2.554
IMAS-84:D08WFACXX:1:250018656	7.662	7.623	7.933	7.93	74.077	74.209	0.119	-0.063	233.359	234.642	112.421	113.174	0.48	0.481	1.026	1.051	2.891	3.028
IMAS-85:D08WFACXX:1:250018657	7.73	7.723	8.112	8.192	74.864	75.251	0.1	-0.097	220.241	219.741	98.256	97.069	0.447	0.44	0.981	0.95	2.438	2.387
IMAS-86:D08WFACXX:1:250018658	7.813	7.882	8.165	8.336	73.46	73.412	0.406	0.43	220.535	219.95	105.709	105.687	0.475	0.476	1.003	0.997	2.254	2.068
IMAS-87:D08WFACXX:1:250018659	6.885	6.527	7.032	6.689	71.863	71.359	0.145	-0.025	201.303	198.104	99.928	99.023	0.496	0.501	0.989	0.967	3.276	3.566
IMAS-88:D08WFACXX:1:250018660	7.778	7.796	8.024	8.076	73.926	74.017	0.175	0.031	223.718	223.686	104.769	104.55	0.466	0.464	0.966	0.915	2.561	2.555
IMAS-89:D08WFACXX:1:250018661	8.295	8.65	8.438	8.765	74.435	74.847	0.508	0.629	228.244	229.341	106.81	107.102	0.466	0.463	1.015	1.032	2.21	2.056
IMAS-9:D08WFACXX:1:250018614	8.288	8.501	8.074	8.13	73.818	73.88	0.193	0.06	228.852	229.571	110.423	110.907	0.48	0.481	0.995	0.982	2.383	2.297
IMAS-90:D08WFACXX:1:250018662	8.062	8.195	8.132	8.221	74.385	74.631	0.366	0.35	234.599	236.179	111.16	111.785	0.475	0.475	1.043	1.089	2.683	2.733
IMAS-91:D08WFACXX:1:250018663	7.566	7.497	7.96	7.983	74.143	74.31	-0.167	-0.563	229.606	230.334	110.486	110.922	0.485	0.487	1.04	1.083	2.39	2.322
IMAS-92:D08WFACXX:1:250018664	7.11	6.83	7.413	7.201	74.082	74.198	0.203	0.074	227.925	228.378	108.181	108.356	0.475	0.475	1.03	1.058	2.397	2.323
IMAS-93:D08WFACXX:1:250018665	8.307	8.553	8.468	8.7	74.24	74.45	0.434	0.467	239.049	241.346	115.72	117.058	0.482	0.484	1.039	1.08	2.375	2.287
IMAS-94:D08WFACXX:1:250018666	8.156	8.333	8.205	8.326	74.516	74.781	0.348	0.322	227.592	228.127	107.673	107.722	0.472	0.471	0.983	0.955	2.264	2.149
IMAS-95:D08WFACXX:1:250018667	8.011	8.12	8.205	8.32	74.437	74.717	0.22	0.113	226.601	226.877	111.934	112.595	0.488	0.491	1.016	1.028	2.701	2.762
IMAS-96:D08WFACXX:1:250018668	8.127	8.273	8.434	8.631	74.219	74.403	0.101	-0.098	232.235	233.282	109.667	109.987	0.476	0.476	1.028	1.056	2.698	2.758
IMAS-97:D08WFACXX:2:250018700	8.032	8.147	8.283	8.428	74.659	74.972	0.785	1.065	226.626	226.97	106.135	106.001	0.469	0.468	1.027	1.052	2.407	2.349
IMAS-98:D08WFACXX:2:250018701	8.834	9.291	8.744	9.075	74.925	75.315	0.3	0.233	240.682	243.102	117.499	119.056	0.487	0.49	1.054	1.113	2.317	2.217
IMAS-99:D08WFACXX:2:250018702	8.338	8.577	8.431	8.627	74.504	74.797	0.459	0.504	229.529	230.273	111.99	112.721	0.484	0.487	1.007	1.008	2.596	2.612
